# Supplementary material
Source: MDPI journal article supplement (https://www.mdpi.com/1424-2818/14/6/467)
Supplement: s1 [file s1]

# Achatina analysis

Prof. Dr. Bruno Vilela - UFBA | IBio

31-05-2021

## Before starting

Prior to the analyzes, we recommend all users to check the latest version of R at <http://www.r-project.org/> and to make sure that they are using the updated versions of their installed R packages. Users can automatically update their installed packages with the following code:

```
# Update installed packages  
# update.packages(checkBuilt = TRUE, ask = FALSE)
```

The analysis presented here makes use of the following R packages available at CRAN. Use the following code to install them.

```
# Install packages  
# install.packages("knitr")  
# install.packages("spThin")  
# install.packages("rgeos")  
# install.packages("sp")  
# install.packages("maptools")  
# install.packages("raster")  
# install.packages("ecospat")  
# install.packages("here")  
# install.packages("tidyverse")  
# install.packages("rnaturalearth")  
# install.packages("stars")  
# install.packages("sf")
```

Once installed, load them.

```
# Load packages  
library(knitr)  
library(spThin)  
library(rgeos)  
library(sp)  
library(maptools)  
library(raster)  
library(ecospat)  
library(here)  
library(tidyverse)  
library(sf)  
library(rnaturalearth)  
library(stars)  
library(readxl)  
library(colorspace)
```

# Data

## Load the occurrence records

Load the occurrence records into the R environment.

```
occ.points1 <- read_excel(here("Data",
                              "achatinapontos.xls"))
occ.points2 <- read_excel(here("Data",
                              "eppsnativasontos.xls"))

for (i in 2:10) {
  occ.points2 <- bind_rows(occ.points2, read_excel(here("Data",
                                                         "eppsnativasontos.xls"),
                                                         sheet = i))
}
colnames(occ.points2)[1] <- "Species"
occ.points <- distinct(bind_rows(occ.points1, occ.points2))
```

The loaded table includes 2604 occurrence records.

## Thining occurrence records

The occurrence records gathered (see the methods section of the manuscript, for the description of how we obtained the data) are not free from geographical sample bias. To minimize this problem, we applied a thinning procedure using the `spThin` package to make sure that all the points have at least a minimum distance of 10km from each other (see Aiello-Lammens et al. 2014 for the algorithm description).

```
species <- unique(occ.points$Species)
occ.points.thin <- list()
for (i in 1:length(species)) {
  occ.points.thin[[i]] <- occ.points %>%
    filter(Species == species[i]) %>%
    thin(
      verbose = FALSE,
      lat.col = "Latitude",
      long.col = "Longitude",
      spec.col = "Species",
      thin.par = 10,
      reps = 1,
      write.files = FALSE,
      write.log.file = FALSE,
      locs.thinned.list.return = TRUE
    )
}
occ.points.thin <- lapply(occ.points.thin, "[[", 1)
names(occ.points.thin) <- species
```

After the thinning procedure the number of occurrence points is reduced for each species to  $n$  = *Achatina fulica* 586, *elongatus* 25, *granulosus* 19, *haemastomus* 17, *musculus* 22, *paranaguensis* 25, *sanctipauli* 29, *yporanganus* 17, *dryades* 31, *intertextus* 12, *lorentzianus* 24.

## Define the regions to be tested

The first step is to define the number of groups (regions) to be tested. In the follow case we choose 3 groups.

```
n.groups <- 11
```

Now define the name of the groups, in the same geographical order of the groups, starting from the west to east. You can also define the codes to be used in the tables.

```
g.names <- species
```

```
g.codenames <- g.names
```

It is also necessary to set what colors will be used in the next plots for each group (using the same order as the names). Change the colors according to your preferences.

```
g.colors <- c("mediumpurple", 'darkgreen', 'blue','red',  
             "lemonchiffon2", "deeppink", "black",  
             "darkorchid4", "gold", "brown", "orange")
```

To check the distribution of the occurrence records we map them in a world context.

```
occ.points.thin2 <- do.call(rbind, occ.points.thin) %>%  
  tibble::rownames_to_column(var = "species") %>%  
  mutate(species = gsub("\\..*", "", species),  
         species = factor(species, g.names))  
world <- ne_countries(scale = "medium", returnclass = "sf")  
  
g <- ggplot() +  
  geom_sf(data = world) +  
  theme_minimal() +  
  geom_point(occ.points.thin2, mapping = aes(Longitude, Latitude,  
                                             col = species),  
            size = .3) +  
  scale_color_manual(values = g.colors) +  
  xlab("") +  
  ylab("") +  
  theme(  
    strip.text = element_text(face = "italic"),  
    legend.text = element_text(face = "italic"),  
    legend.position = "none"  
  )  
g1 <- g + facet_wrap(species ~ ., ncol = 3, nrow = 4)  
g1
```

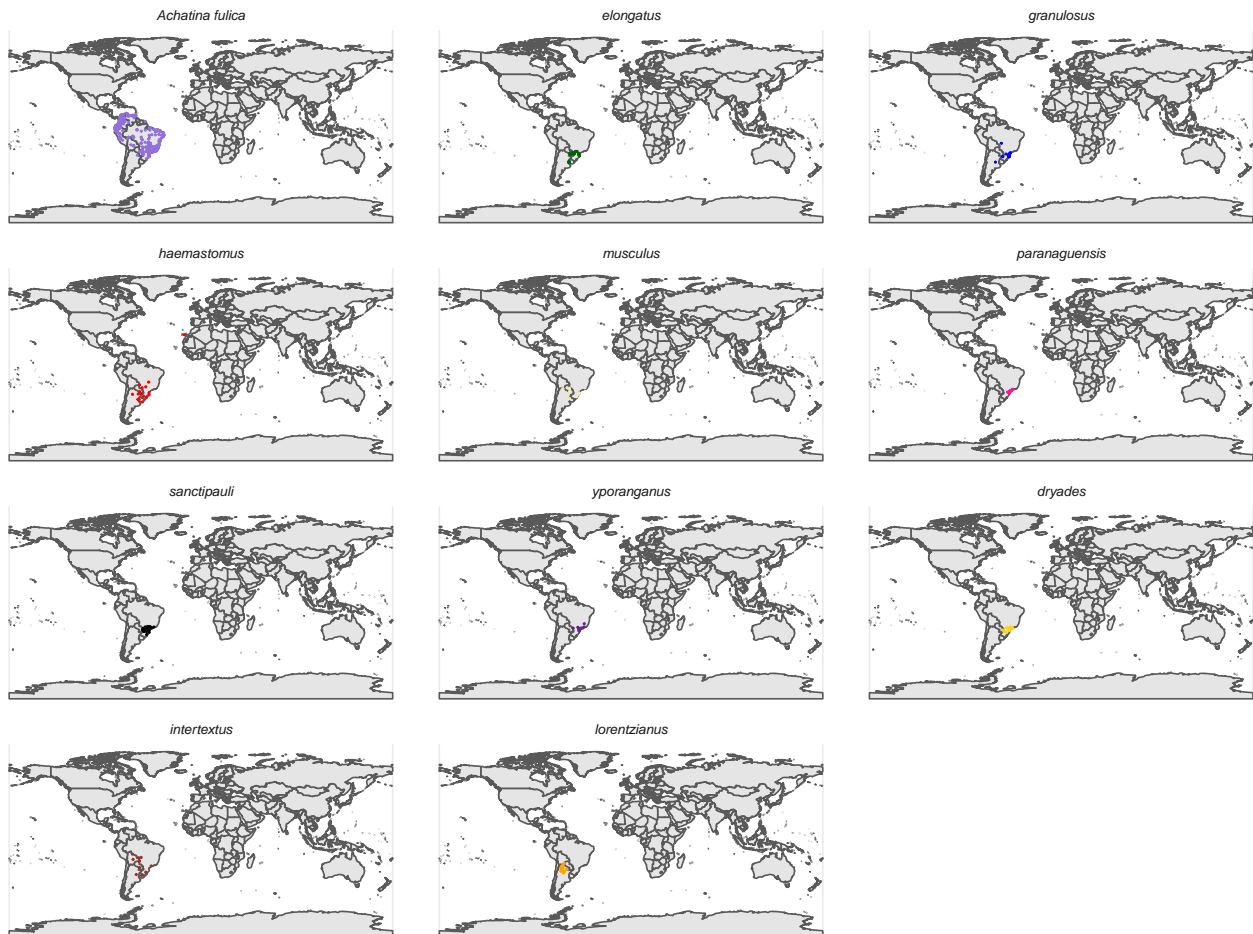

```
loc <- here("Figures", "Figure1.tiff")
# ggsave(loc, g1)
```

Filter points to the countries defined.

```
# map <- world[world$name %in% c("Brazil"), ]

pnts_sf <- st_as_sf(occ.points.thin2,
                    coords = c('Longitude', 'Latitude'),
                    crs = st_crs(map))

# pnts <- pnts_sf %>%
#   mutate(intersection = as.integer(st_intersects(geometry, map)))
#
# remove <- is.na(pnts$intersection)
occ.points.thin3 <- occ.points.thin2

g <- ggplot() +
  geom_sf(data = filter(world, continent == "South America")) +
  theme_minimal() +
  geom_point(occ.points.thin3, mapping = aes(Longitude, Latitude,
                                              col = species),
             size = .3) +
  scale_color_manual(values = g.colors) +
  xlab("") +
```

```
ylab("") +
theme(
  strip.text = element_text(face = "italic"),
  legend.text = element_text(face = "italic"),
  legend.position = "none",
  axis.text.x = element_text(angle = 45, hjust = 1))

g1 <- g + facet_wrap(species ~ ., ncol = 4, nrow = 3)
g1
```

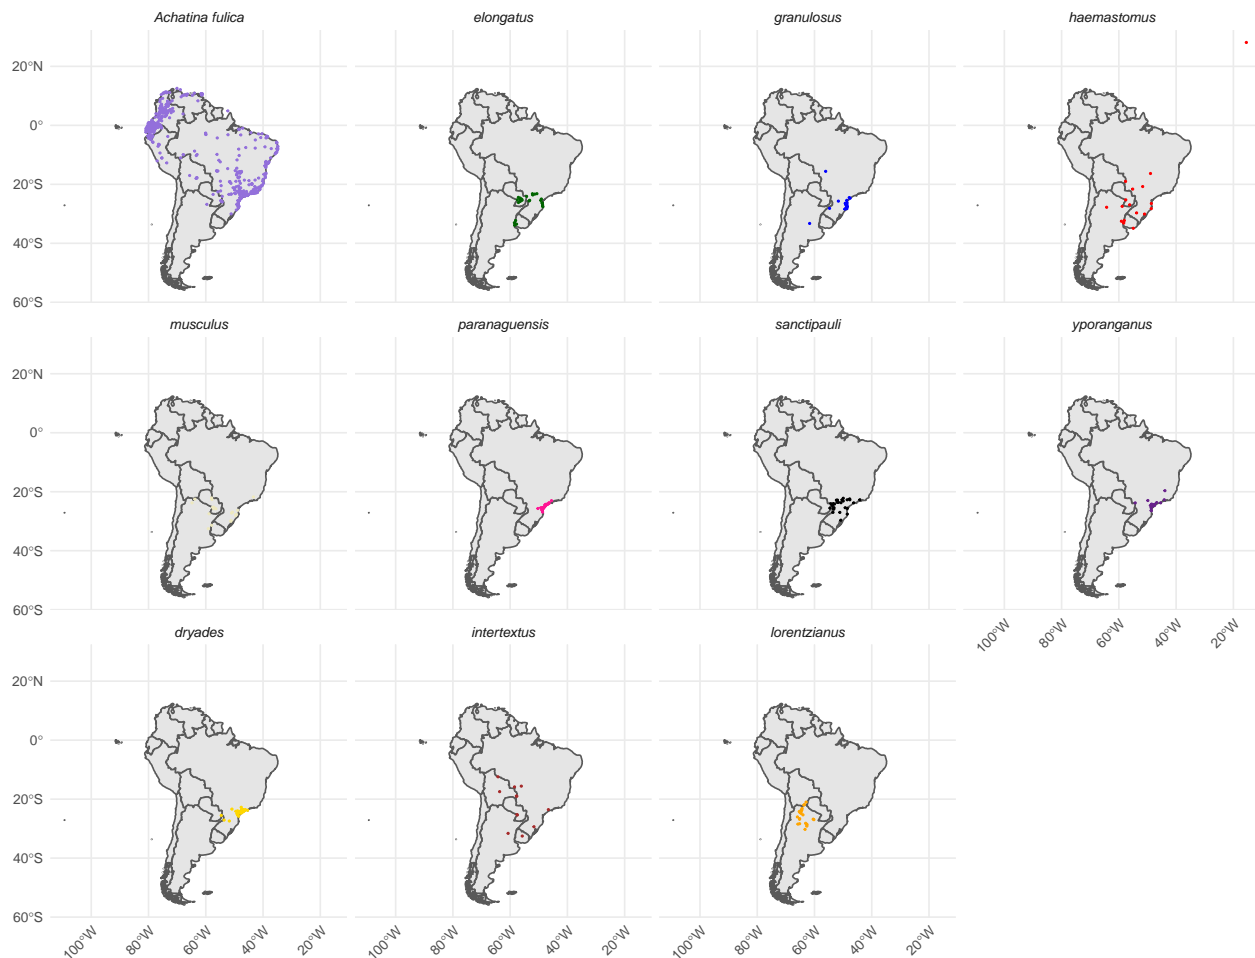

```
loc <- here("Figures", "Figure2.tiff")
# ggsave(loc, g1)
```

## Background definition

An important step in the niche analysis is the definition of the background. Here we applied a background based on a minimum convex polygon (MCP) made from the occurrence records of each group. Additionally to the MCP we add a buffer around it. The polygon buffer size for the background (in degrees) can be changed below. We chose 2 degrees based on the species dispersion.

```
buffer.size <- 2
```

We define a minimum convex polygon (MCP) function below (this function was obtained from <https://>

`//github.com/ndimhypervol/wallace).`

```
mcp <- function (xy) {  
  xy <- as.data.frame(coordinates(xy))  
  coords.t <- chull(xy[, 1], xy[, 2])  
  xy.bord <- xy[coords.t, ]  
  xy.bord <- rbind(xy.bord[nrow(xy.bord), ], xy.bord)  
  return(SpatialPolygons(list(Polygons(list(Polygon(as.matrix(xy.bord))), 1))))  
}
```

## Environmental variables

The environmental variables used are available at the WorldClim website (<http://www.worldclim.org>). Download all the 19 bioclimatic ('Biolclim') variables for the current conditions (we used the resolution of 10 arc-min) with the code below. Note you need to have the internet on. The download files are opened directed in the R environment, but they are also saved in your work directory (to see where it is, use `getwd()`).

```
variables <- raster::stack(list.files(  
  here("pres"),  
  full.names = TRUE))
```

In the manuscript we used all the 19 bioclimatic variables as before the analysis we will reduce them to a two-dimensional space with a PCA. However, the readers can choose the number of variables to keep by changing the sequence `1:19` in the code below for the variable number you want to keep (to see the name sequence of the variables apply `names(variables)`).

```
variables <- subset(variables, 1:nlayers(variables))
```

You can also check the variables, by mapping them.

```
plot(variables)
```

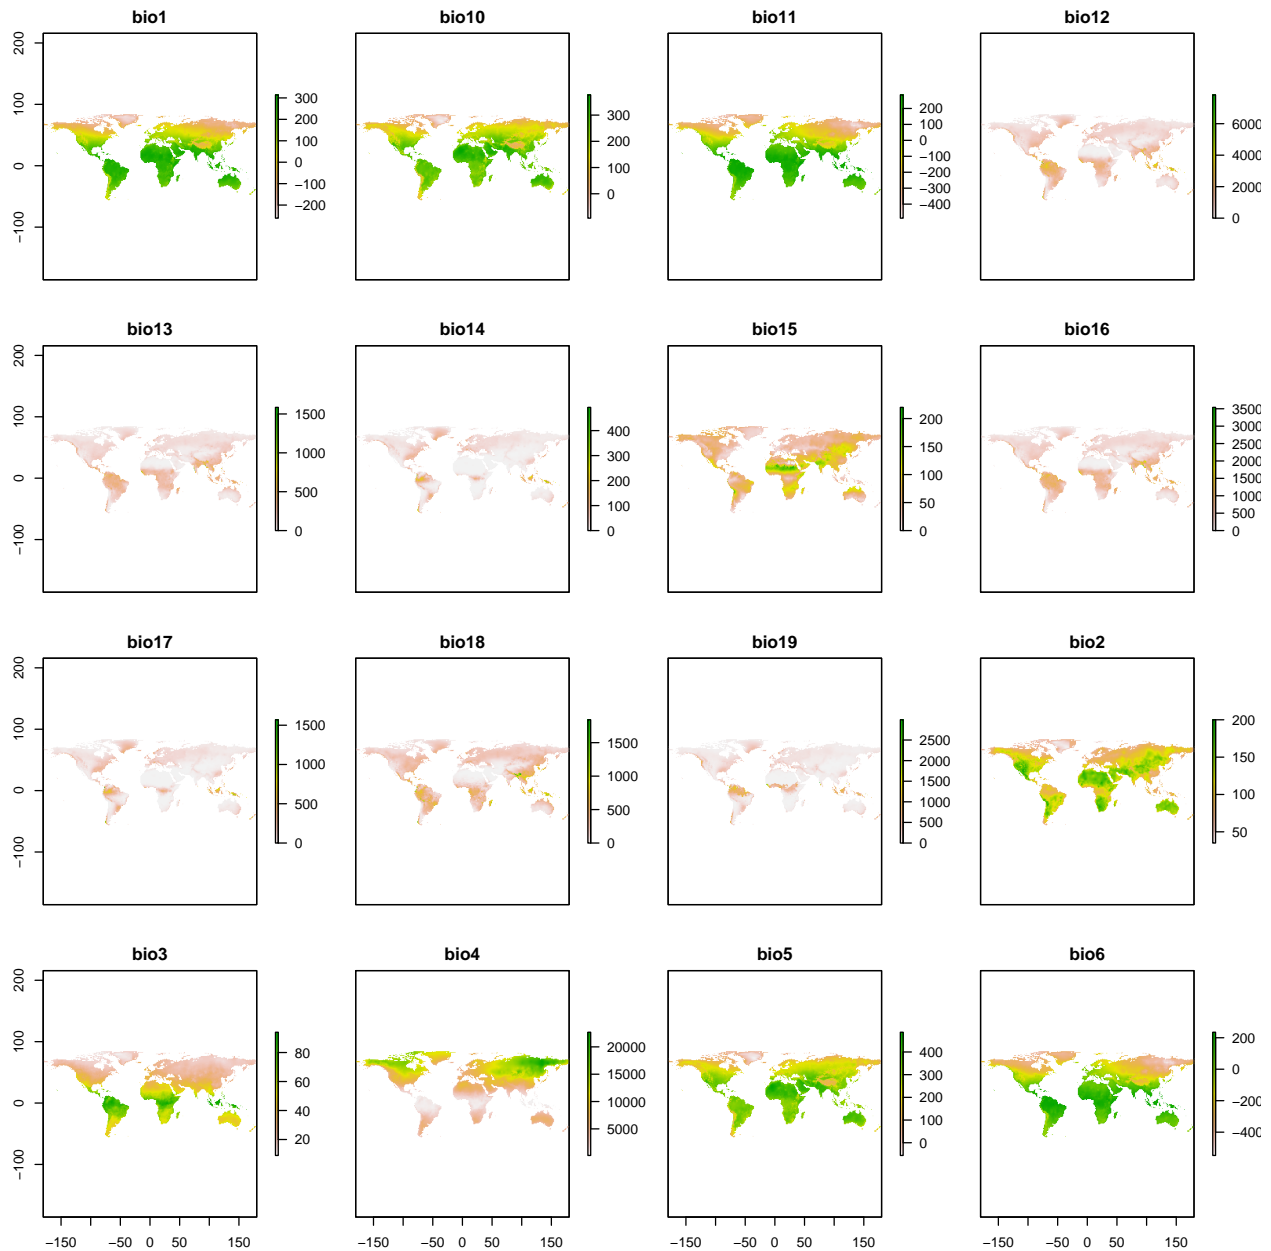

## Group assigning

Once, we have the occurrence data, the environmental data, the defined groups and their background parameters chosen, we can prepare the data for the analysis. Below we use the occurrence points to generate the MCP plus a buffer defined by the user for the background (see above). Next, the variable values per group are extracted from the species occurrence points and from the background (defined above). Finally we plot the resulting groups with their respective backgrounds.

```
# Empty objects
g.assign <- occ.points.thin3$species
xy.mcp <- list()
back.env <- list()
spec.env <- list()
row.sp <- list()
```

```

united <- st_union(st_make_valid(world))

# Loop
for (i in 1:n.groups) {
  print(i)
  # Save row numbers per species
  g.limit <- g.assign == species[i]
  row.sp[[i]] <- which(g.limit)

  # Background polygon
  mcp.occ <- mcp(as.matrix(occ.points.thin3[g.limit, -1]))
  xy.mcp.i <- gBuffer(mcp.occ, width = buffer.size) %>%
    st_as_sf() %>%
    st_set_crs(value = st_crs(world))

  xy.mcp[[i]] <- st_intersection(xy.mcp.i, united)
  xy.mcp[[i]]$species <- species[i]
  # Background environment
  extract_temp <- raster::extract(variables, as_Spatial(xy.mcp[[i]]))
  back.env[[i]] <- na.exclude(do.call(rbind.data.frame,
                                     extract_temp))

  # Species environment
  spec.env[[i]] <- na.exclude(raster::extract(variables,
                                              occ.points.thin3[g.limit, -1]))
}

```

```

## [1] 1
## [1] 2
## [1] 3
## [1] 4
## [1] 5
## [1] 6
## [1] 7
## [1] 8
## [1] 9
## [1] 10
## [1] 11

```

Map buffers:

```

xy.mcp.is <- do.call(rbind, xy.mcp)
xy.mcp.is$species <- factor(xy.mcp.is$species, xy.mcp.is$species)

g <- ggplot() +
  geom_sf(data = filter(world, continent == "South America")) +
  theme_minimal() +
  geom_sf(data = xy.mcp.is, aes(col = species)) +
  geom_point(occ.points.thin3, mapping = aes(Longitude, Latitude,
                                             col = species),
             size = .3) +
  scale_color_manual(values = g.colors) +
  xlab("") +
  ylab("") +

```



```
theme(  
  strip.text = element_text(face = "italic"),  
  legend.text = element_text(face = "italic"),  
  legend.position = "none",  
  axis.text.x = element_text(angle = 45, hjust = 1))  
g1 <- g + facet_wrap(species ~ ., ncol = 3, nrow = 4)  
g1
```

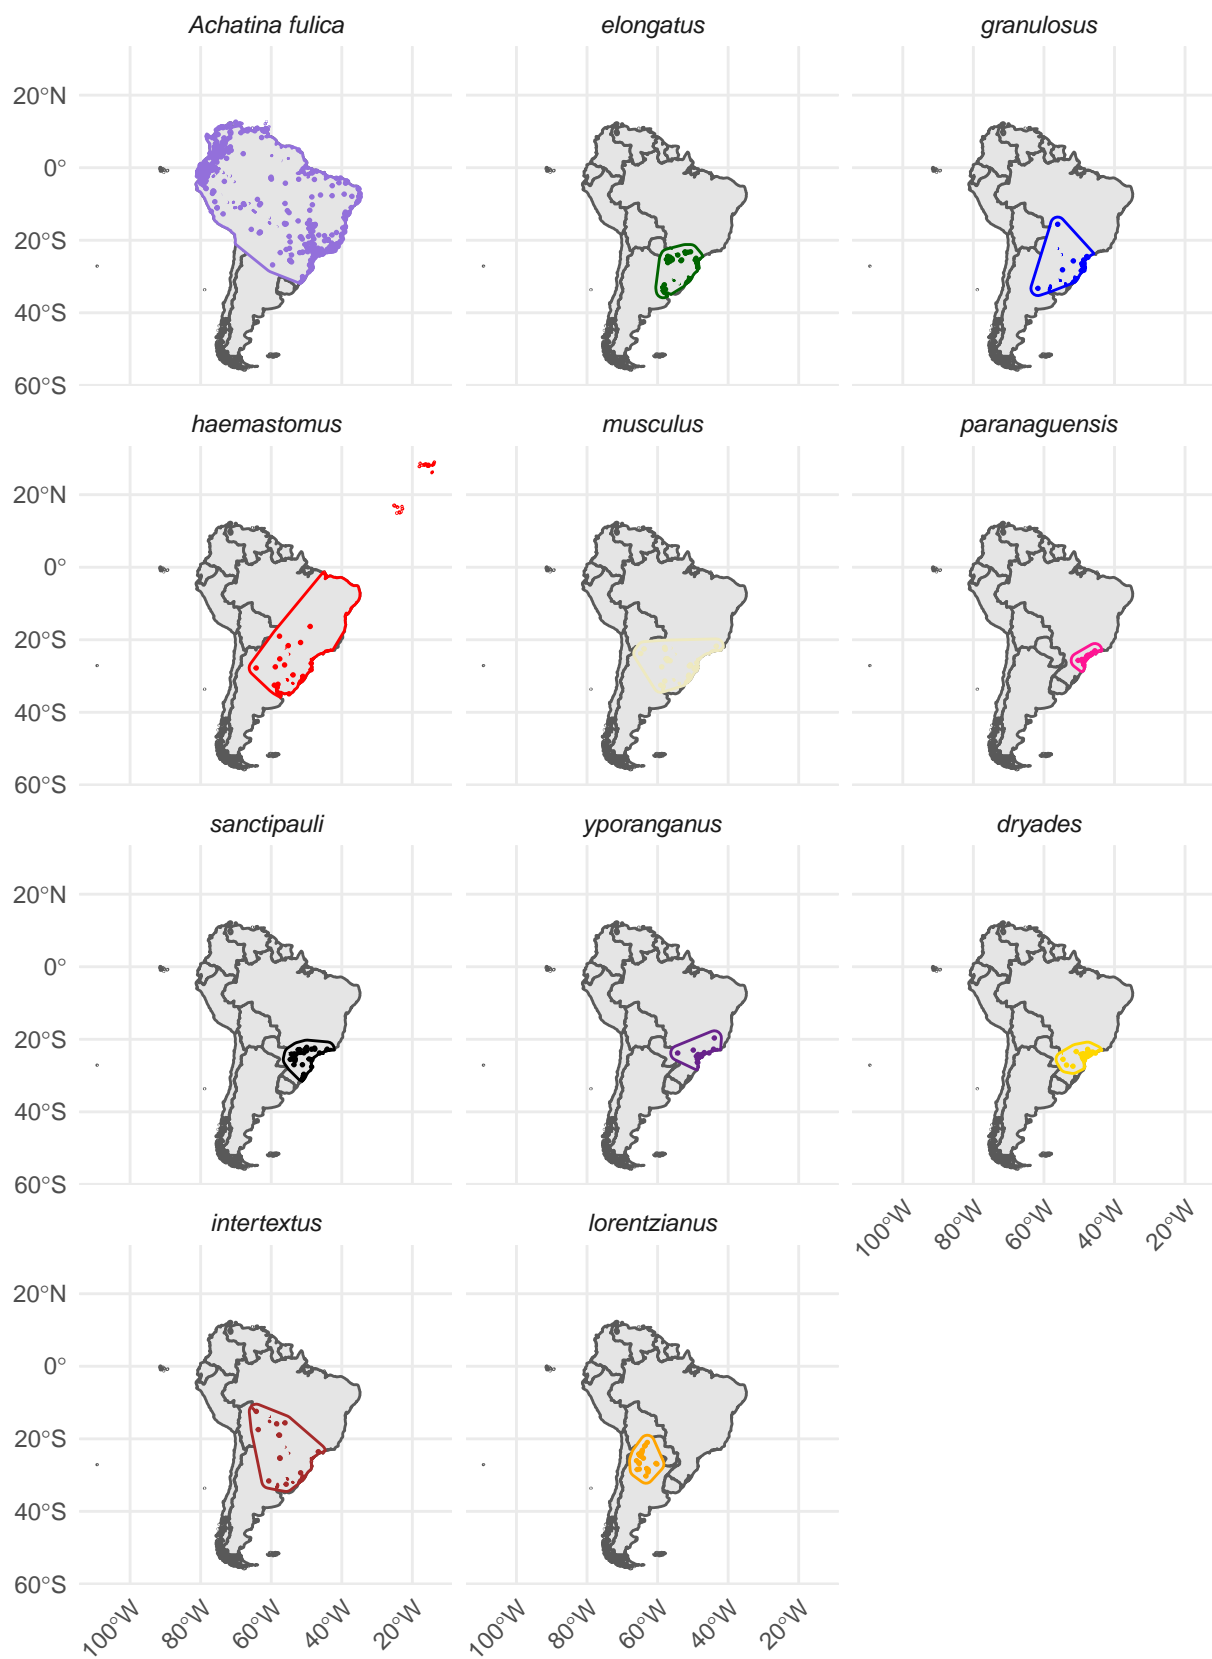

```
loc <- here("Figures", "Figure.tiff")
#ggsave(loc, g1)
```

Save the occurrence points table.

```
write.csv(occ.points.thin3,
          file = here("Data", "occurrences.csv"),
          row.names = FALSE)
```

Now we organize the final tables to be used.

```
# Occurrence points per group
g.occ.points <- occ.points.thin3
colnames(g.occ.points)[1] <- "Groups"
# Environmental values for the background
all.back.env <- do.call(rbind.data.frame, back.env)
# Environmental values for the species occurrence points
all.spec.env <- do.call(rbind.data.frame, spec.env)
# Environmental values all together
data.env <- rbind(all.spec.env, all.back.env)
```

Check the number of occurrence records per region.

```
table(g.occ.points[, 1])
```

```
Achatina fulica elongatus granulatus haemastomus musculus 586 25 19 17 22 paranaguensis sanctipauli
yporanganus dryades intertextus 25 29 17 31 12 lorentzianus 24
```

## Niche comparissons

The niche analyzes and comparisons follow the framework developed by Broennimann et al. (2012) and its derivations (see methods section in the manuscript).

### PCA

We chose to apply a PCA (Principal Component Analysis) considering all the environments together, as it presented the best performance when comparing the niches (Broennimann et al., 2012).

```
# Weight matrix
w <- c(rep(0, nrow(all.spec.env)), rep(1, nrow(all.back.env)))
# PCA of all environment
pca.cal <- dudi.pca(data.env, row.w = w, center = TRUE,
                   scale = TRUE, scannf = FALSE, nf = 2)
```

Once we have the pca results, we need the first and second eigenvector values for the background and for the occurrence records per group.

```
# Rows in data corresponding to sp1
adition <- cumsum(c(0, sapply(back.env, nrow)))
begnd <- nrow(all.spec.env)
# Empty list to save the results
scores.back <- list()
scores.spec <- list()

# Assigning the values
```

```

for (i in 1:n.groups) {
  scores.spec[[i]] <- pca.cal$li[row.sp[[i]], ]
  pos <- (begnd[1] + adtion[i] + 1) : (begnd[1] + adtion[i + 1])
  scores.back[[i]] <- pca.cal$li[pos, ]
}

total.scores.back <- do.call(rbind.data.frame, scores.back)

```

## Environmental space

An environmental space is generated based on the pca values calculated for the background and the occurrence records. We defined the resolution of this two-dimensional space grid below.

```
R <- 100
```

Next, we modeled the species density in the environmental grid, considering the observed occurrence density and the availability of the conditions in the background.

```

z <- list()

for (i in 1:n.groups) {
  z[[i]] <- ecospat.grid.clim.dyn(total.scores.back,
                                scores.back[[i]],
                                scores.spec[[i]],
                                R = R)
}

```

## Niche overlap

For the niche overlap, we calculate the D metric and its significance, using a similarity test. We define the number of interactions for the similarity test below (see the methods section in the manuscript for details).

```
rep <- 100
```

Once the number of interactions is defined, we can generate the values. Additionally, we calculate the partition of the non-overlapped niche, among niche unfilling, expansion and stability (see methods in the manuscript).

```

# Empty matrices
D <- matrix(nrow = n.groups, ncol = n.groups)
rownames(D) <- colnames(D) <- substr(g.codenames, 1, 3)
unfilling <- stability <- expansion <- sim <- D

for (i in 1) {

  for (j in 2:n.groups) {

    x1 <- z[[i]]
    x2 <- z[[j]]

    # Niche overlap
    D[i, j] <- ecospat.niche.overlap (x1, x2, cor = TRUE)$D

    # Niche similarity
    sim[i, j] <- ecospat.niche.similarity.test (x1, x2, rep,

```

```

                                alternative = "greater")$p.D
sim[j, i] <- ecospat.niche.similarity.test (x2, x1, rep,
                                alternative = "greater")$p.D

# Niche Expansion, Stability, and Unfilling
index1 <- ecospat.niche.dyn.index (x1, x2,
                                intersection = NA)$dynamic.index.w
index2 <- ecospat.niche.dyn.index (x2, x1,
                                intersection = NA)$dynamic.index.w

expansion[i, j] <- index1[1]
stability[i, j] <- index1[2]
unfilling[i, j] <- index1[3]
expansion[j, i] <- index2[1]
stability[j, i] <- index2[2]
unfilling[j, i] <- index2[3]
}
}

```

## Numeric results

Below we present the results for each metric, among all the groups.

D value:

```
kable(D, digits = 3, format = "markdown")
```

|     | Ach | elo   | gra   | hae   | mus   | par   | san   | ypo   | dry   | int   | lor   |
|-----|-----|-------|-------|-------|-------|-------|-------|-------|-------|-------|-------|
| Ach | NA  | 0.021 | 0.033 | 0.033 | 0.035 | 0.046 | 0.024 | 0.024 | 0.039 | 0.014 | 0.002 |
| elo | NA  | NA    | NA    | NA    | NA    | NA    | NA    | NA    | NA    | NA    | NA    |
| gra | NA  | NA    | NA    | NA    | NA    | NA    | NA    | NA    | NA    | NA    | NA    |
| hae | NA  | NA    | NA    | NA    | NA    | NA    | NA    | NA    | NA    | NA    | NA    |
| mus | NA  | NA    | NA    | NA    | NA    | NA    | NA    | NA    | NA    | NA    | NA    |
| par | NA  | NA    | NA    | NA    | NA    | NA    | NA    | NA    | NA    | NA    | NA    |
| san | NA  | NA    | NA    | NA    | NA    | NA    | NA    | NA    | NA    | NA    | NA    |
| ypo | NA  | NA    | NA    | NA    | NA    | NA    | NA    | NA    | NA    | NA    | NA    |
| dry | NA  | NA    | NA    | NA    | NA    | NA    | NA    | NA    | NA    | NA    | NA    |
| int | NA  | NA    | NA    | NA    | NA    | NA    | NA    | NA    | NA    | NA    | NA    |
| lor | NA  | NA    | NA    | NA    | NA    | NA    | NA    | NA    | NA    | NA    | NA    |

Niche similarity null model (p-values):

```
kable(sim, digits = 3, format = "markdown")
```

|     | Ach   | elo  | gra  | hae  | mus  | par  | san  | ypo  | dry  | int   | lor   |
|-----|-------|------|------|------|------|------|------|------|------|-------|-------|
| Ach | NA    | 0.03 | 0.01 | 0.04 | 0.01 | 0.01 | 0.02 | 0.02 | 0.01 | 0.059 | 0.218 |
| elo | 0.020 | NA    | NA    |
| gra | 0.010 | NA    | NA    |
| hae | 0.040 | NA    | NA    |
| mus | 0.020 | NA    | NA    |
| par | 0.010 | NA    | NA    |
| san | 0.040 | NA    | NA    |
| ypo | 0.010 | NA    | NA    |

|     | Ach   | elo | gra | hae | mus | par | san | ypo | dry | int | lor |
|-----|-------|-----|-----|-----|-----|-----|-----|-----|-----|-----|-----|
| dry | 0.010 | NA  |
| int | 0.040 | NA  |
| lor | 0.188 | NA  |

Niche Unfilling:

```
kable(unfilling, digits = 3, format = "markdown")
```

|     | Ach   | elo   | gra   | hae   | mus   | par   | san  | ypo   | dry   | int   | lor   |
|-----|-------|-------|-------|-------|-------|-------|------|-------|-------|-------|-------|
| Ach | NA    | 0.801 | 0.783 | 0.601 | 0.646 | 0.736 | 0.79 | 0.772 | 0.728 | 0.564 | 0.983 |
| elo | 0.000 | NA    | NA    | NA    | NA    | NA    | NA   | NA    | NA    | NA    | NA    |
| gra | 0.019 | NA    | NA    | NA    | NA    | NA    | NA   | NA    | NA    | NA    | NA    |
| hae | 0.042 | NA    | NA    | NA    | NA    | NA    | NA   | NA    | NA    | NA    | NA    |
| mus | 0.046 | NA    | NA    | NA    | NA    | NA    | NA   | NA    | NA    | NA    | NA    |
| par | 0.000 | NA    | NA    | NA    | NA    | NA    | NA   | NA    | NA    | NA    | NA    |
| san | 0.013 | NA    | NA    | NA    | NA    | NA    | NA   | NA    | NA    | NA    | NA    |
| ypo | 0.000 | NA    | NA    | NA    | NA    | NA    | NA   | NA    | NA    | NA    | NA    |
| dry | 0.000 | NA    | NA    | NA    | NA    | NA    | NA   | NA    | NA    | NA    | NA    |
| int | 0.033 | NA    | NA    | NA    | NA    | NA    | NA   | NA    | NA    | NA    | NA    |
| lor | 0.558 | NA    | NA    | NA    | NA    | NA    | NA   | NA    | NA    | NA    | NA    |

Niche Expansion:

```
kable(expansion, digits = 3, format = "markdown")
```

|     | Ach   | elo | gra   | hae   | mus   | par | san   | ypo | dry | int   | lor   |
|-----|-------|-----|-------|-------|-------|-----|-------|-----|-----|-------|-------|
| Ach | NA    | 0   | 0.019 | 0.042 | 0.046 | 0   | 0.013 | 0   | 0   | 0.033 | 0.558 |
| elo | 0.801 | NA  | NA    | NA    | NA    | NA  | NA    | NA  | NA  | NA    | NA    |
| gra | 0.783 | NA  | NA    | NA    | NA    | NA  | NA    | NA  | NA  | NA    | NA    |
| hae | 0.601 | NA  | NA    | NA    | NA    | NA  | NA    | NA  | NA  | NA    | NA    |
| mus | 0.646 | NA  | NA    | NA    | NA    | NA  | NA    | NA  | NA  | NA    | NA    |
| par | 0.736 | NA  | NA    | NA    | NA    | NA  | NA    | NA  | NA  | NA    | NA    |
| san | 0.790 | NA  | NA    | NA    | NA    | NA  | NA    | NA  | NA  | NA    | NA    |
| ypo | 0.772 | NA  | NA    | NA    | NA    | NA  | NA    | NA  | NA  | NA    | NA    |
| dry | 0.728 | NA  | NA    | NA    | NA    | NA  | NA    | NA  | NA  | NA    | NA    |
| int | 0.564 | NA  | NA    | NA    | NA    | NA  | NA    | NA  | NA  | NA    | NA    |
| lor | 0.983 | NA  | NA    | NA    | NA    | NA  | NA    | NA  | NA  | NA    | NA    |

Niche Stability:

```
kable(stability, digits = 3, format = "markdown")
```

|     | Ach   | elo | gra   | hae   | mus   | par | san   | ypo | dry | int   | lor   |
|-----|-------|-----|-------|-------|-------|-----|-------|-----|-----|-------|-------|
| Ach | NA    | 1   | 0.981 | 0.958 | 0.954 | 1   | 0.987 | 1   | 1   | 0.967 | 0.442 |
| elo | 0.199 | NA  | NA    | NA    | NA    | NA  | NA    | NA  | NA  | NA    | NA    |
| gra | 0.217 | NA  | NA    | NA    | NA    | NA  | NA    | NA  | NA  | NA    | NA    |
| hae | 0.399 | NA  | NA    | NA    | NA    | NA  | NA    | NA  | NA  | NA    | NA    |
| mus | 0.354 | NA  | NA    | NA    | NA    | NA  | NA    | NA  | NA  | NA    | NA    |
| par | 0.264 | NA  | NA    | NA    | NA    | NA  | NA    | NA  | NA  | NA    | NA    |

|     | Ach   | elo | gra | hae | mus | par | san | ypo | dry | int | lor |
|-----|-------|-----|-----|-----|-----|-----|-----|-----|-----|-----|-----|
| san | 0.210 | NA  |
| ypo | 0.228 | NA  |
| dry | 0.272 | NA  |
| int | 0.436 | NA  |
| lor | 0.017 | NA  |

## Figure results

### Individual niche plots

We developed some modifications in the `plot.niche` function available at Broennimann et al 2012. The modifications include more options and flexibility to the plot.

```
plot.niche.mod <- function(z, name.axis1 = "PC1", name.axis2 = "PC2",
                           cor = F, corte, contornar = TRUE,
                           densidade = TRUE, quantis = 10,
                           back = TRUE, x = "red", title = "",
                           i) {

  cor1 <- function(cores.i, n) {
    al <- seq(0,1,(1/n))
    cores <- numeric(length(n))
    for(i in 1:n) {
      corespar <- col2rgb(cores.i)/255
      cores[i] <- rgb(corespar[1, ], corespar[2, ],
                     corespar[3, ], alpha = al[i])
    }
    return(cores)
  }

  al <- colorRampPalette(c("transparent",cor1(x, quantis)), alpha = TRUE)

  xlim <- c(min(sapply(z, function(x){min(x$x)})),
            max(sapply(z, function(x){max(x$x)})))

  ylim <- c(min(sapply(z, function(x){min(x$y)})),
            max(sapply(z, function(x){max(x$y)})))

  graphics::image(z[[1]]$x, z[[1]]$y,
                  t(as.matrix(z[[i]]$z.uncor))[, nrow(as.matrix(z[[i]]$z.uncor)):1],
                  col = "white",
                  ylim = ylim, xlim = xlim,
                  zlim = c(0.000001, max(as.matrix(z[[1]]$z.uncor), na.rm = T)),
                  xlab = "PC1", ylab = "PC2", cex.lab = 1.5,
                  cex.axis = 1.4)

  abline(h = 0, v = 0, lty = 2)

  if (back) {
```

```

    contour(z[[i]]$x, z[[i]]$y,
            t(as.matrix(z[[i]]$Z))[, nrow(as.matrix(z[[i]]$Z)):1],
            add = TRUE, levels = quantile(z[[i]]$Z[z[[i]]$Z > 0],
                                         c(0, 0.5)), drawlabels = FALSE,
            lty = c(1, 2), col = x, lwd = 1)
  }

  if (densidade) {
    image(z[[i]]$x, z[[i]]$y, t(as.matrix(z[[i]]$z.uncor))[, nrow(as.matrix(z[[i]]$z.uncor)):1], col = a)
  }

  if(contornar){
    contour(z[[i]]$x, z[[i]]$y, t(as.matrix(z[[i]]$z.uncor))[, nrow(as.matrix(z[[i]]$z.uncor)):1],
            add = TRUE, levels = quantile(z[[i]]$z.uncor[z[[i]]$z.uncor > 0],
                                         seq(0, 1, (1 / quantis))),
            drawlabels = FALSE, lty = c(rep(2,(quantis - 1)), 1),
            col = cor1(x, quantis), lwd = c(rep(1, (quantis - 1)), 2))
  }

  title(title)
  box()
}

```

We applied this function here to plot all individual results per group. The continuous line represent the 100% of the available environmental background and the dashed line represents the 50% most common conditions.

```

for(i in 1:n.groups) {
  plot.niche.mod(z, name.axis1 = "PC1", name.axis2 = "PC2",
                cor = F, corte, contornar = FALSE,
                densidade = TRUE, quantis = 10,
                back = TRUE, x = g.colors[i], title = g.names[i], i)
}

```



# Achatina fulica

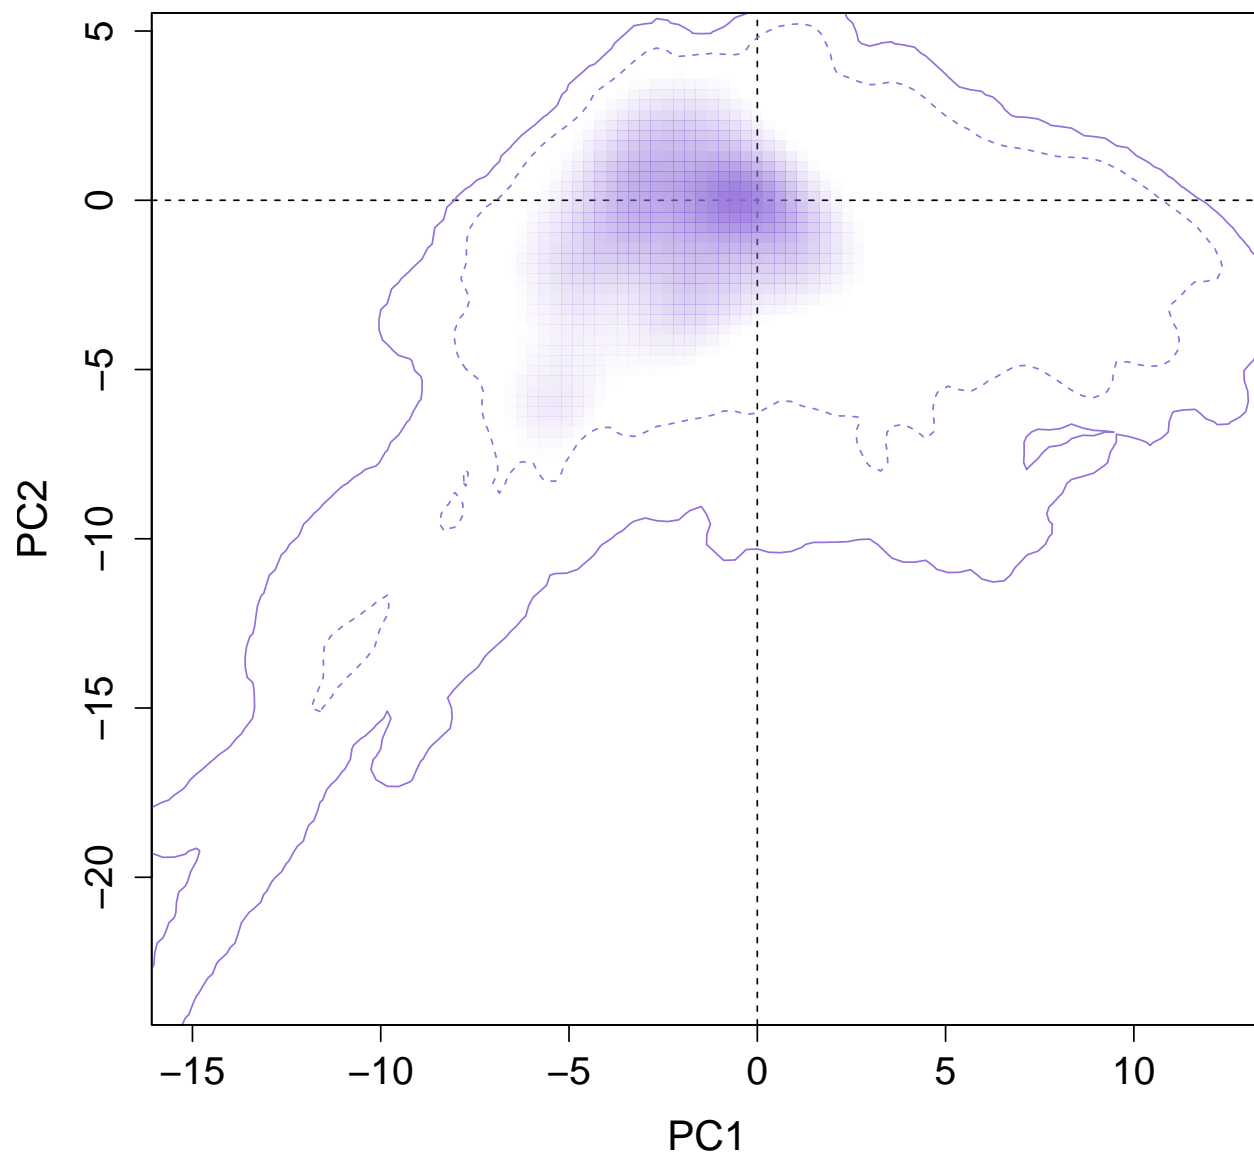

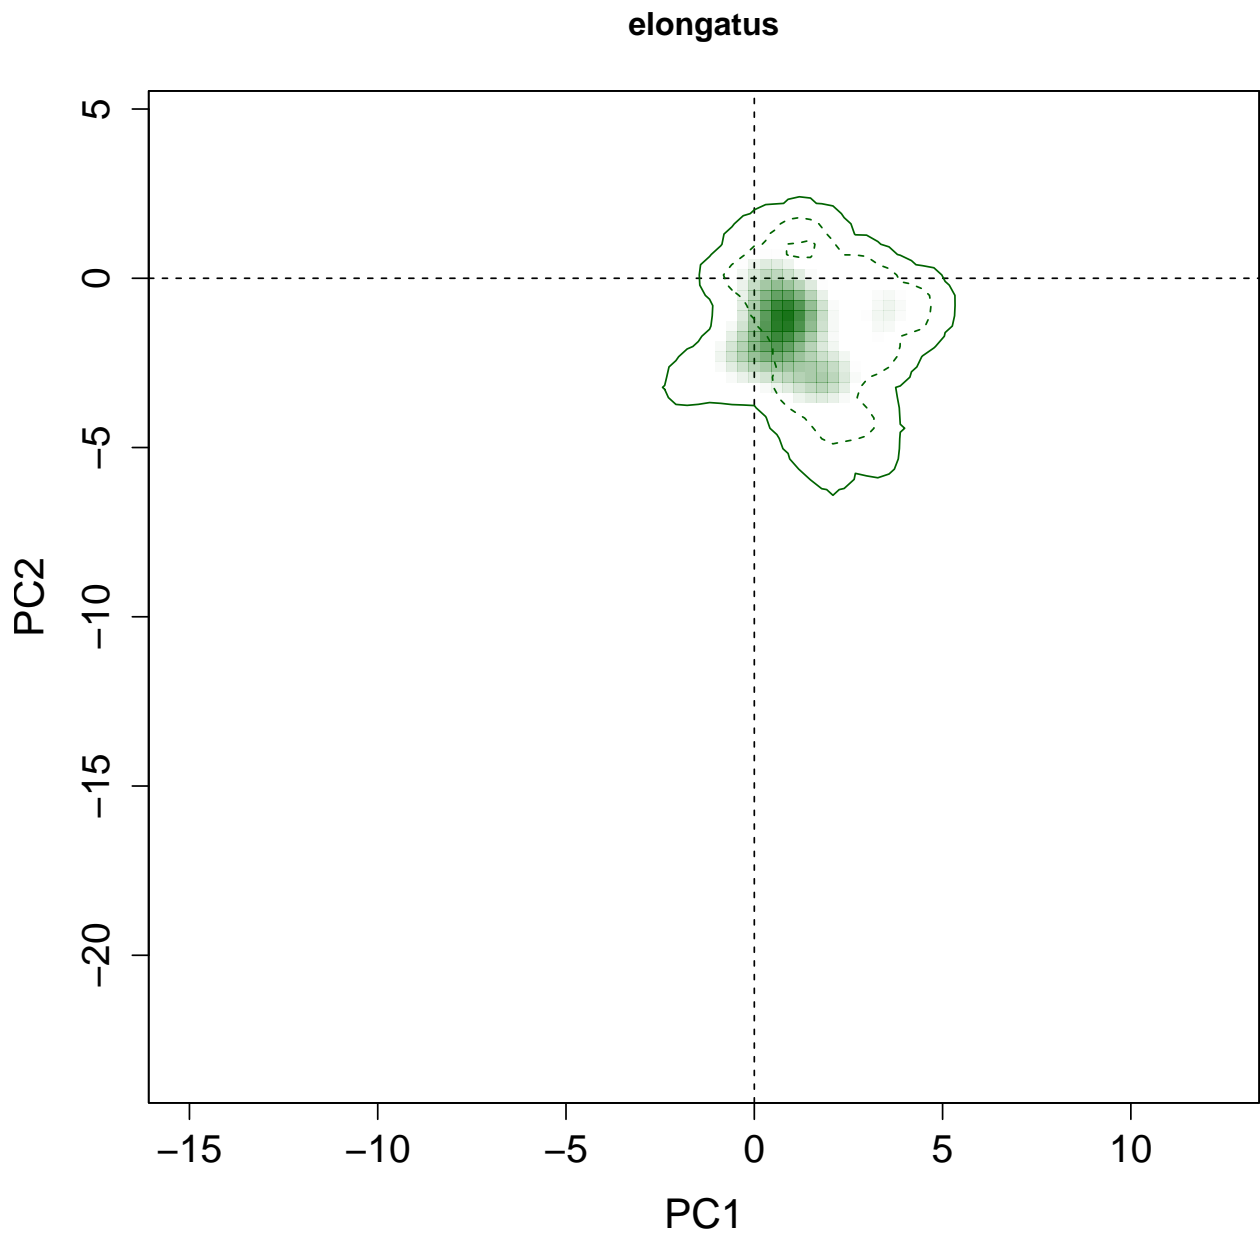

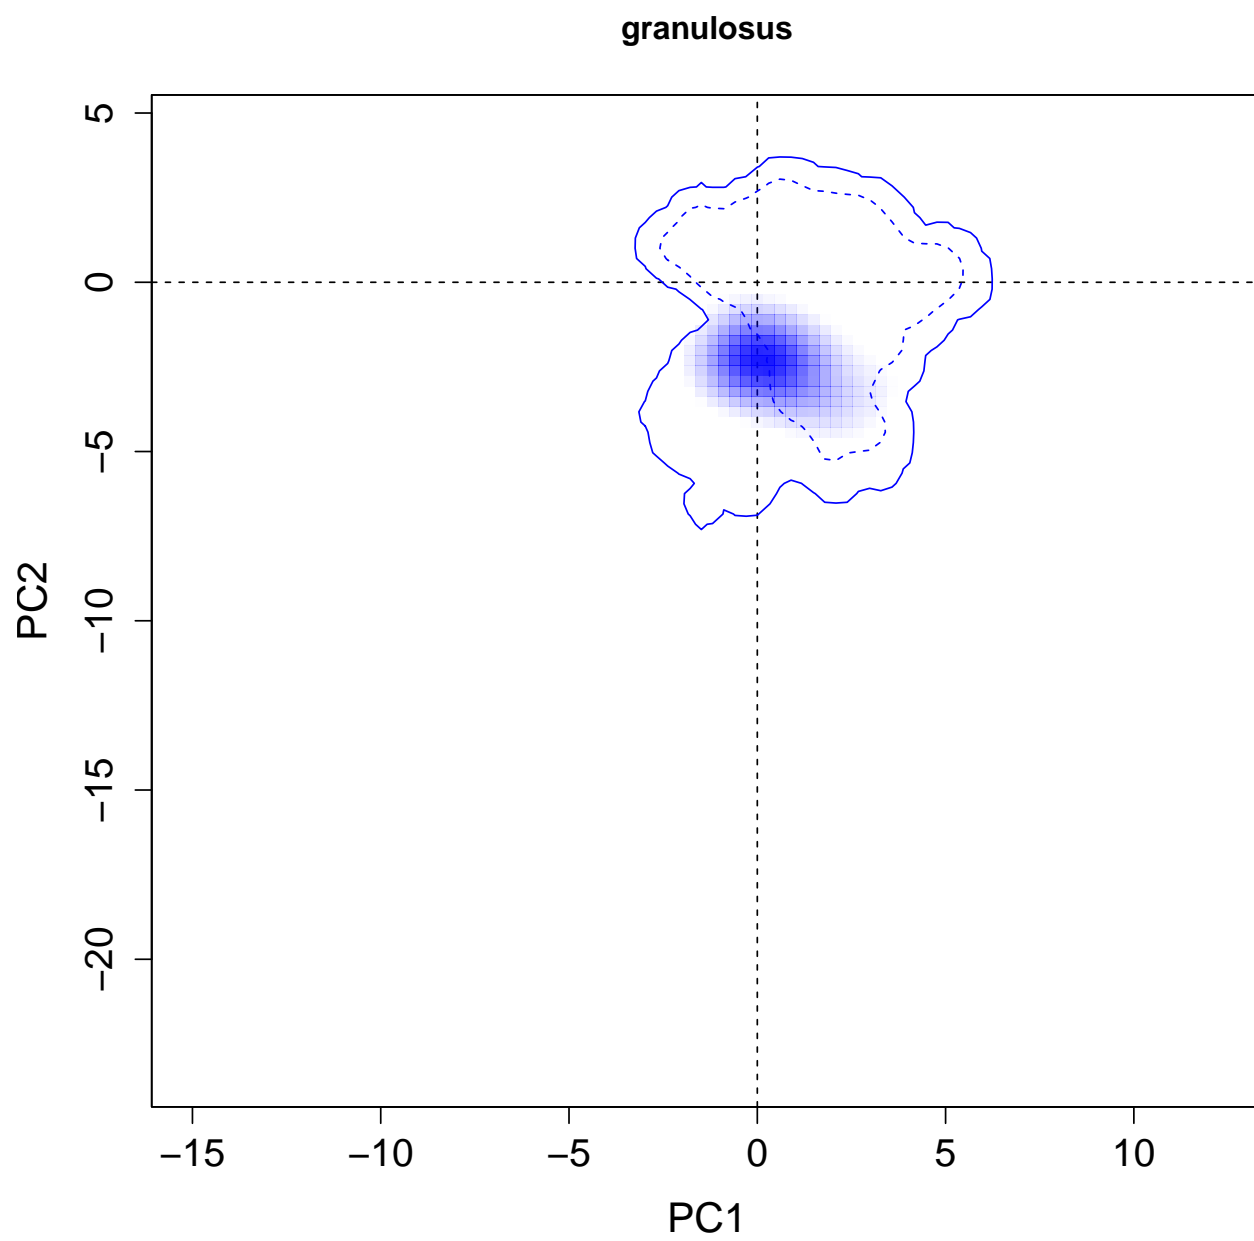

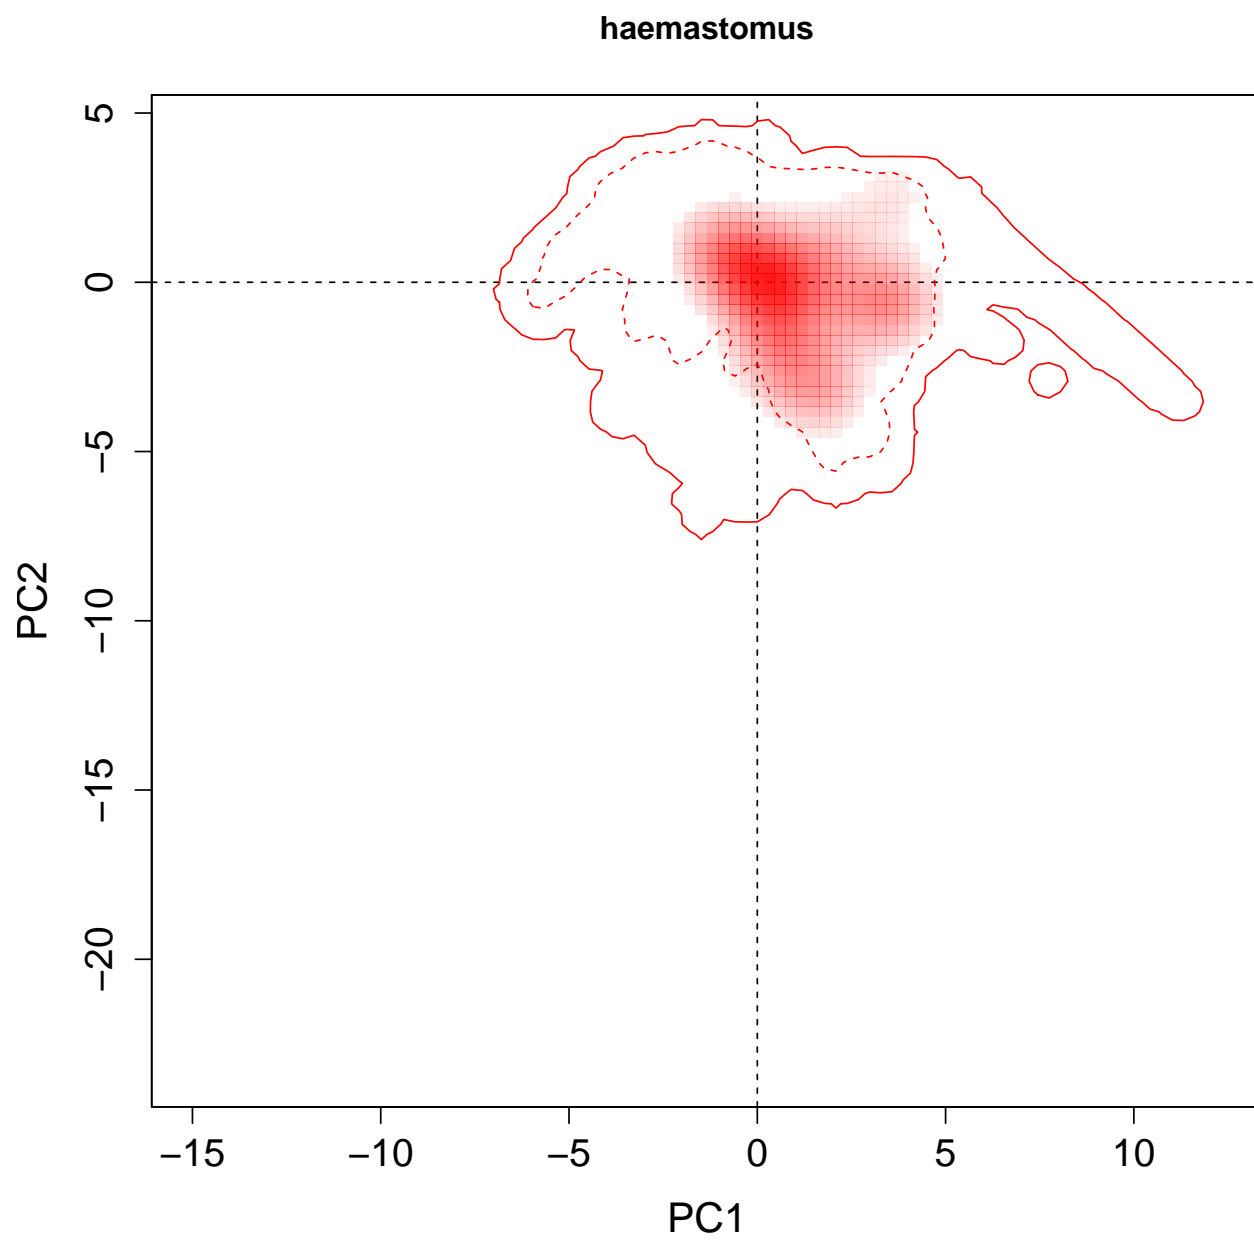

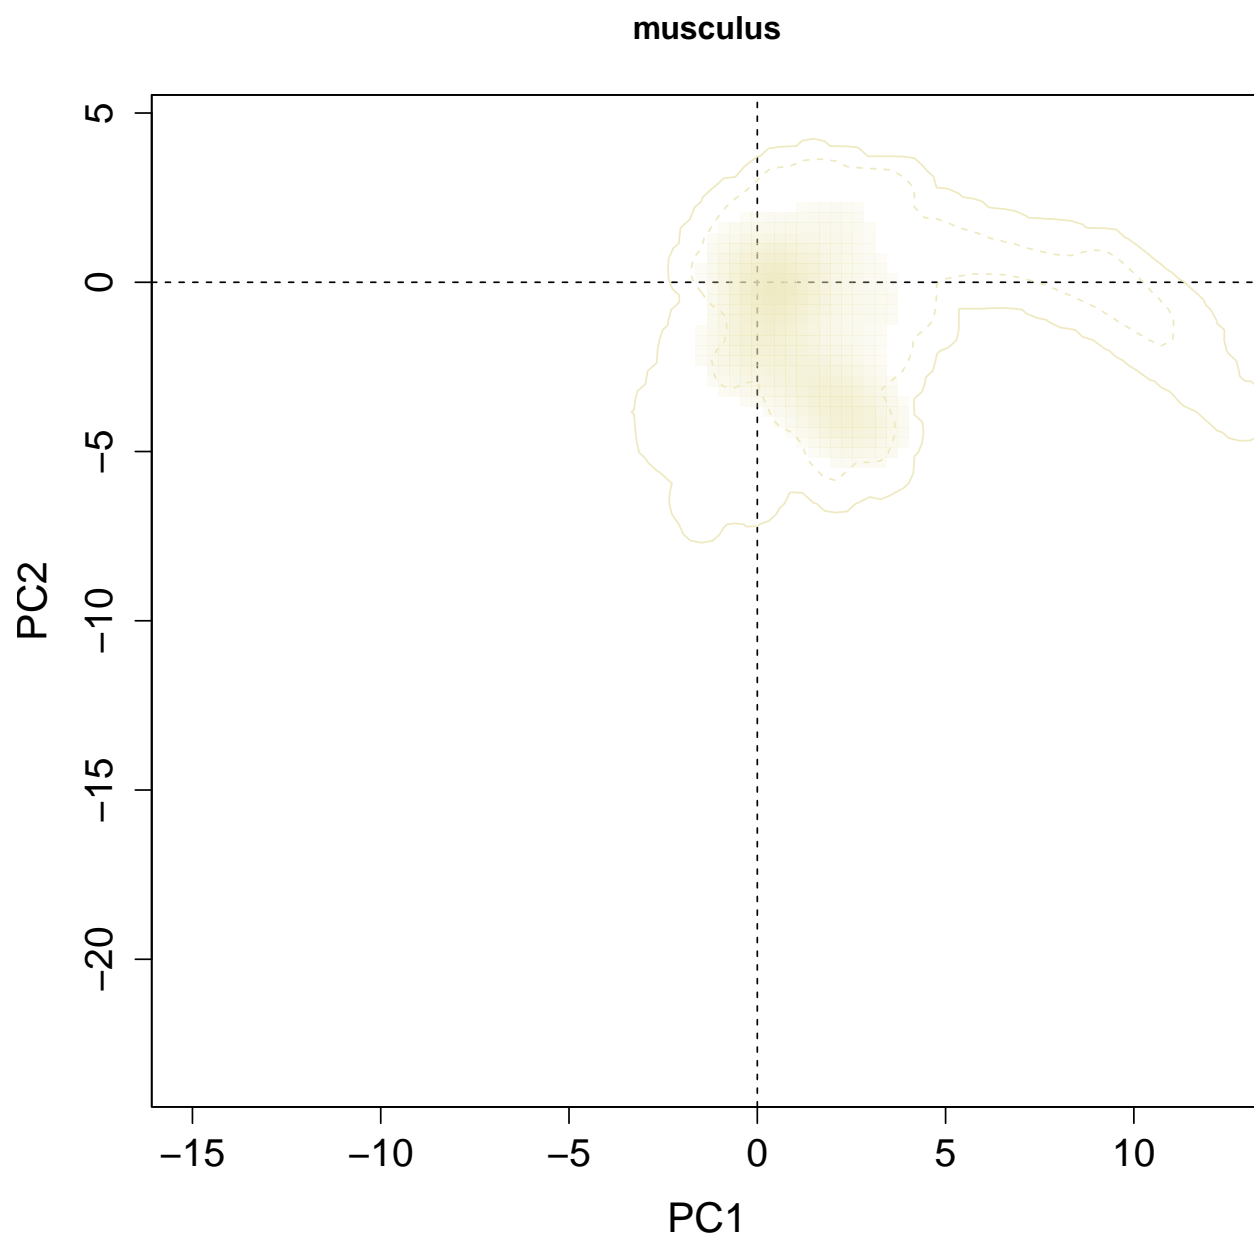

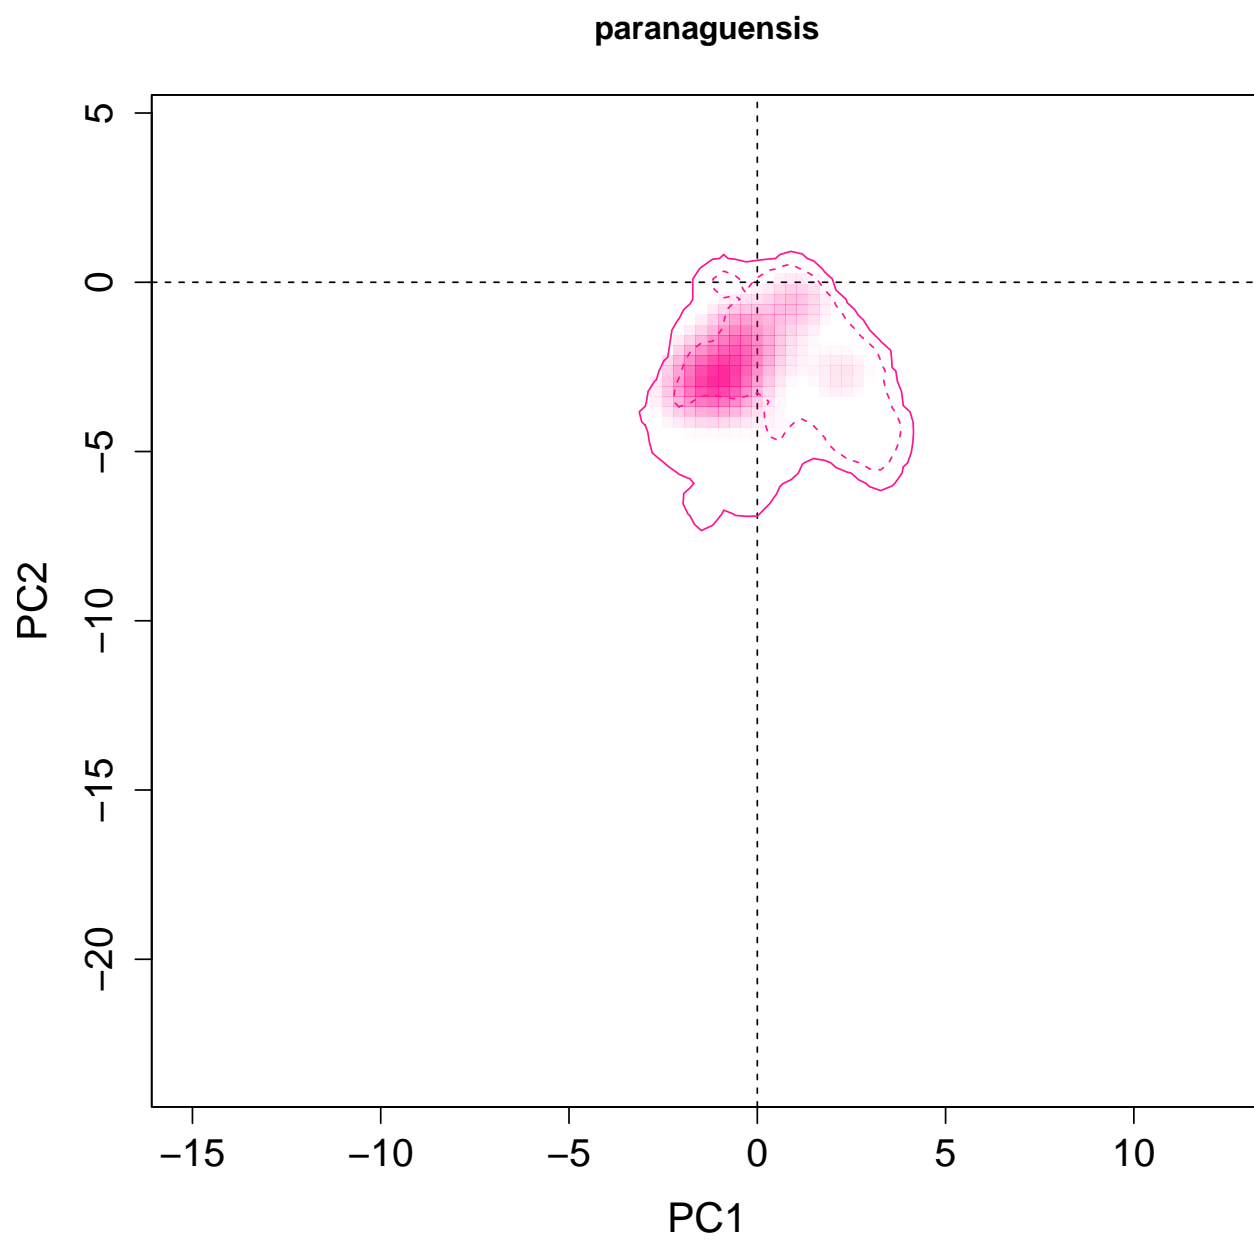

# sanctipauli

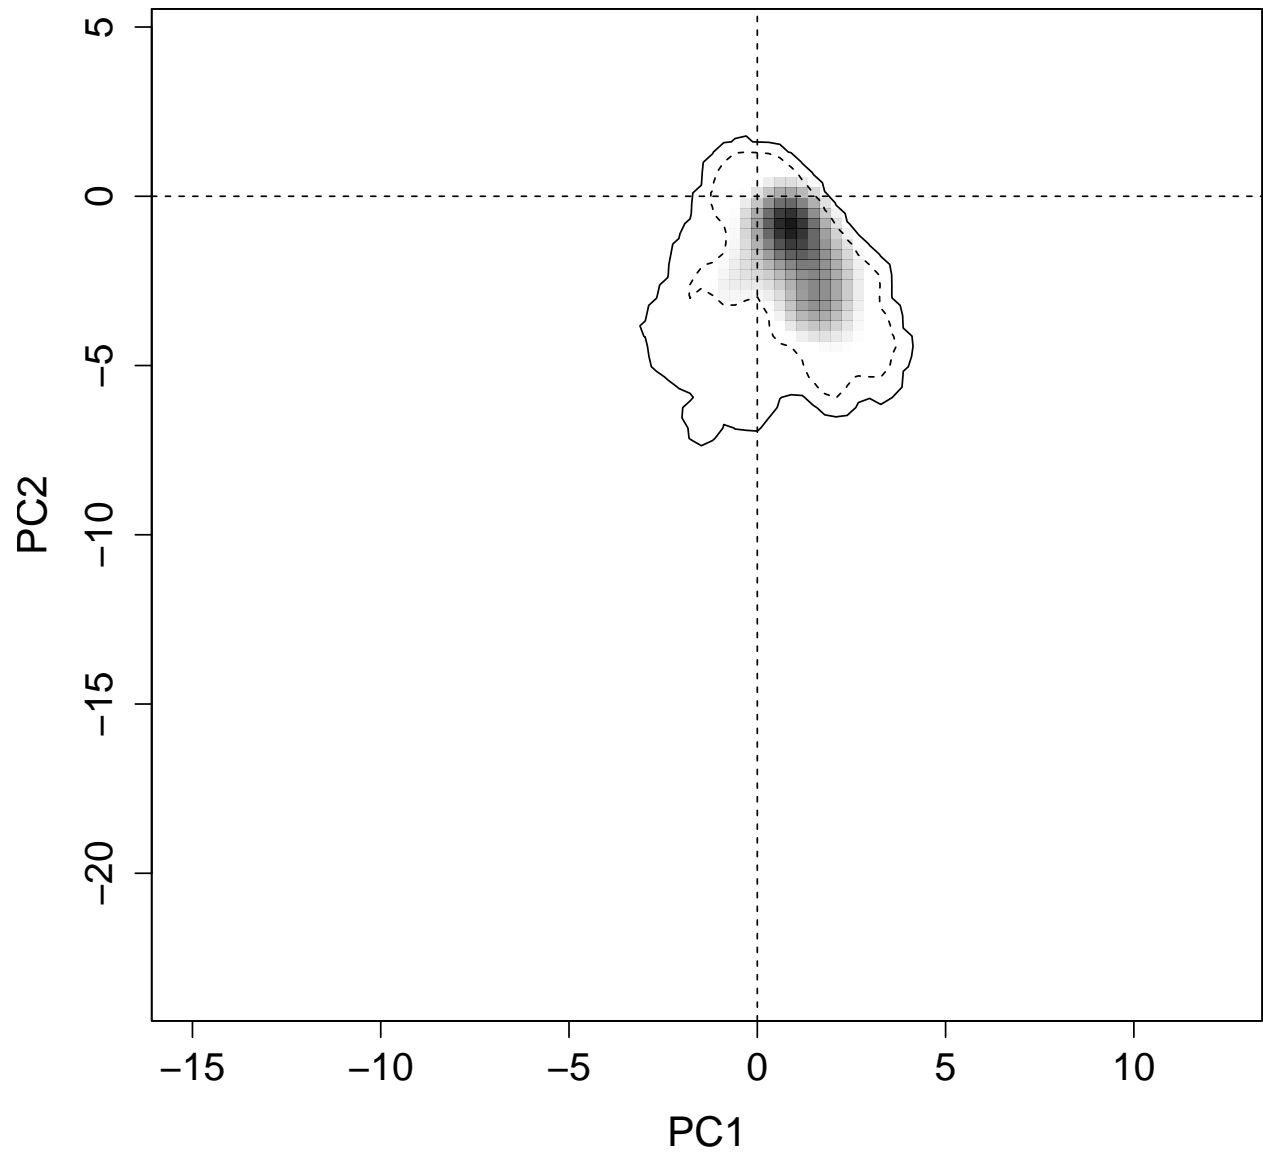

# yporanganus

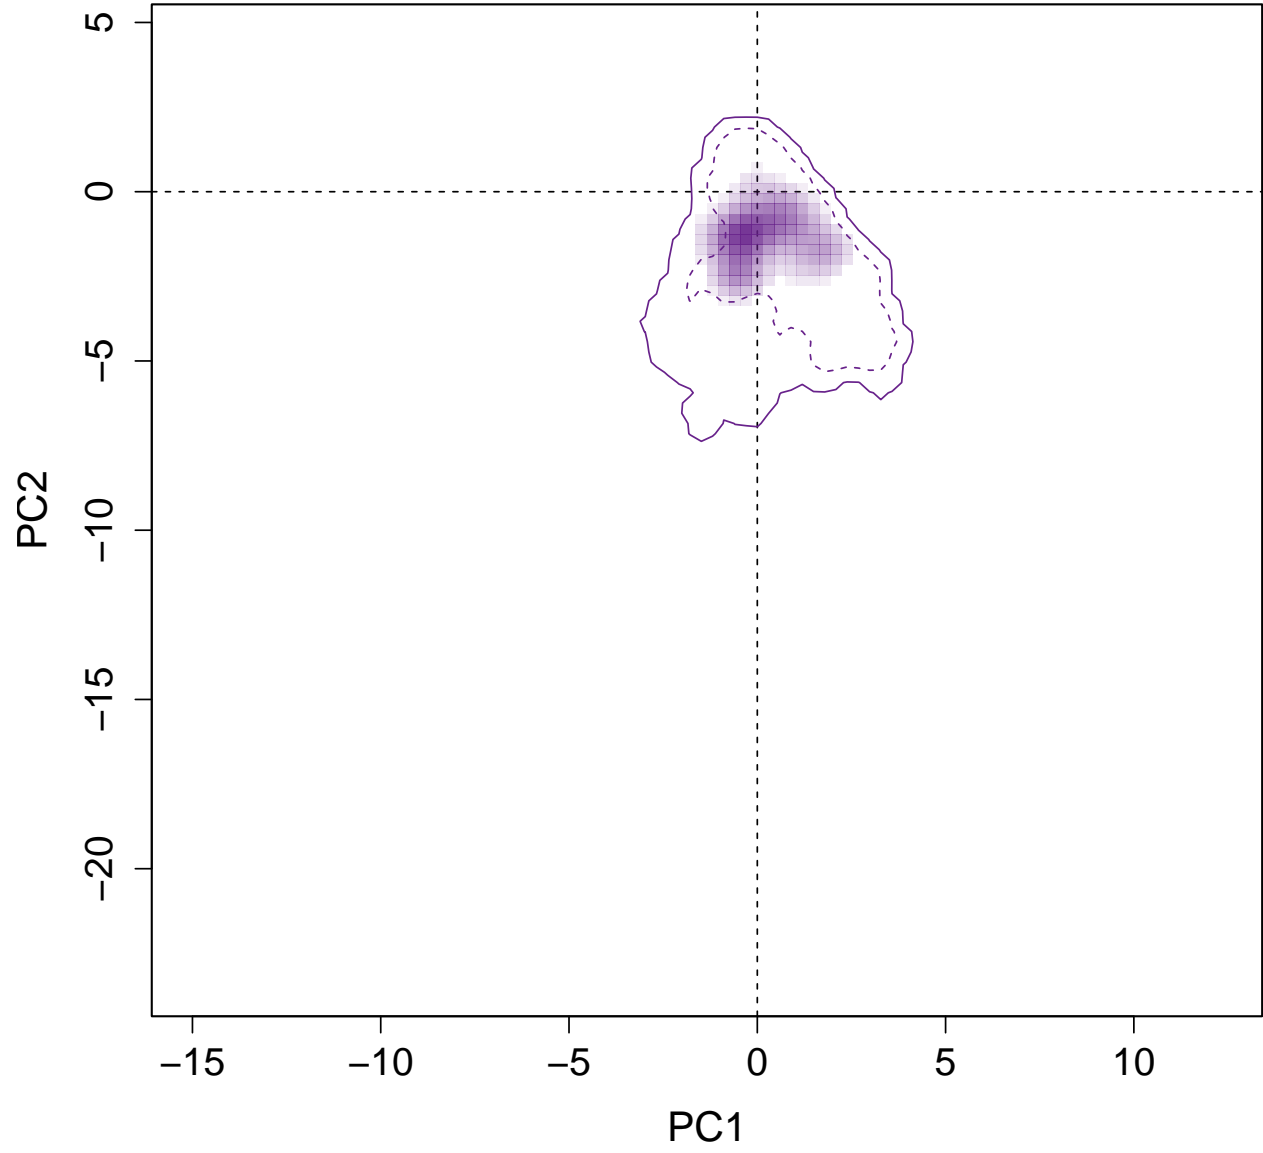



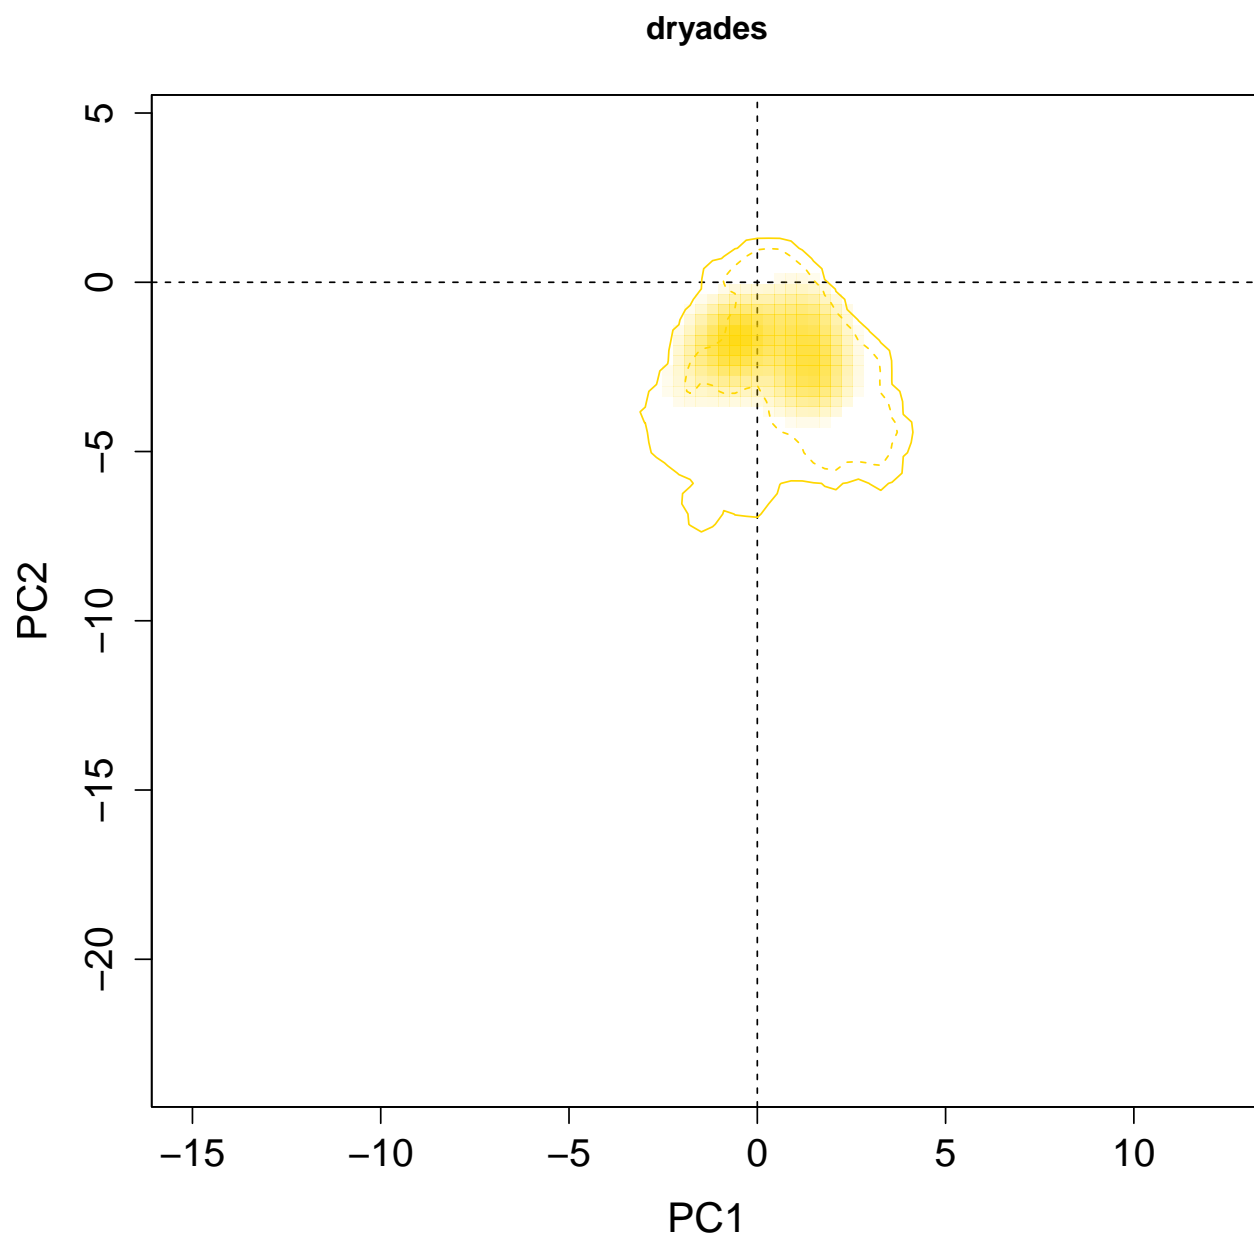

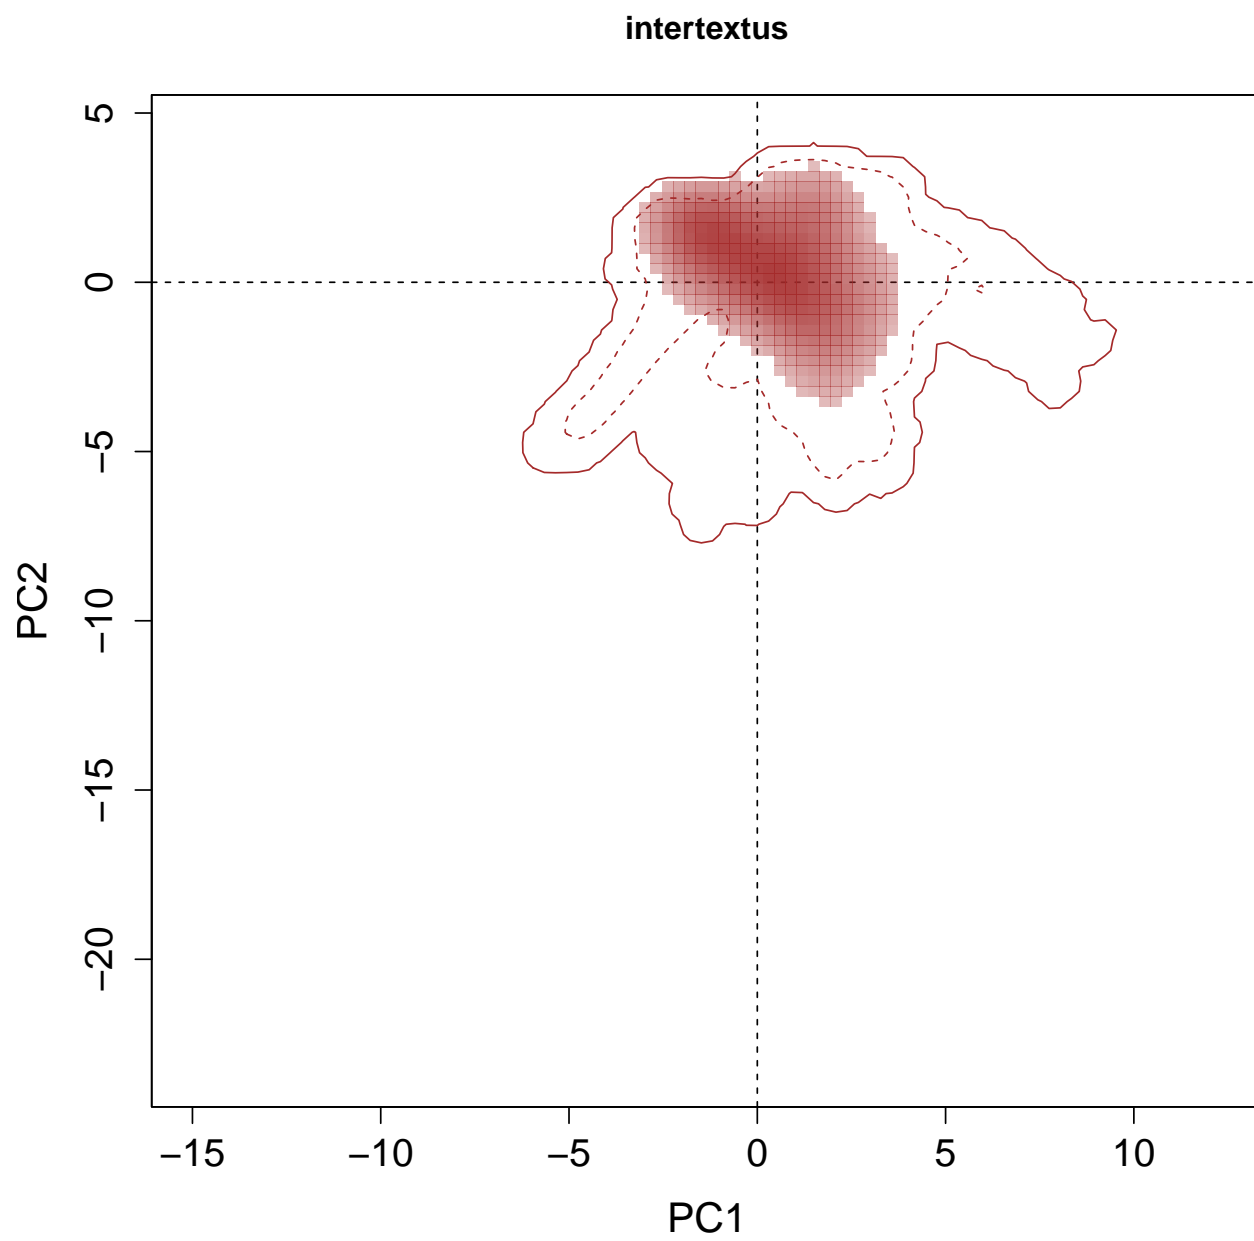

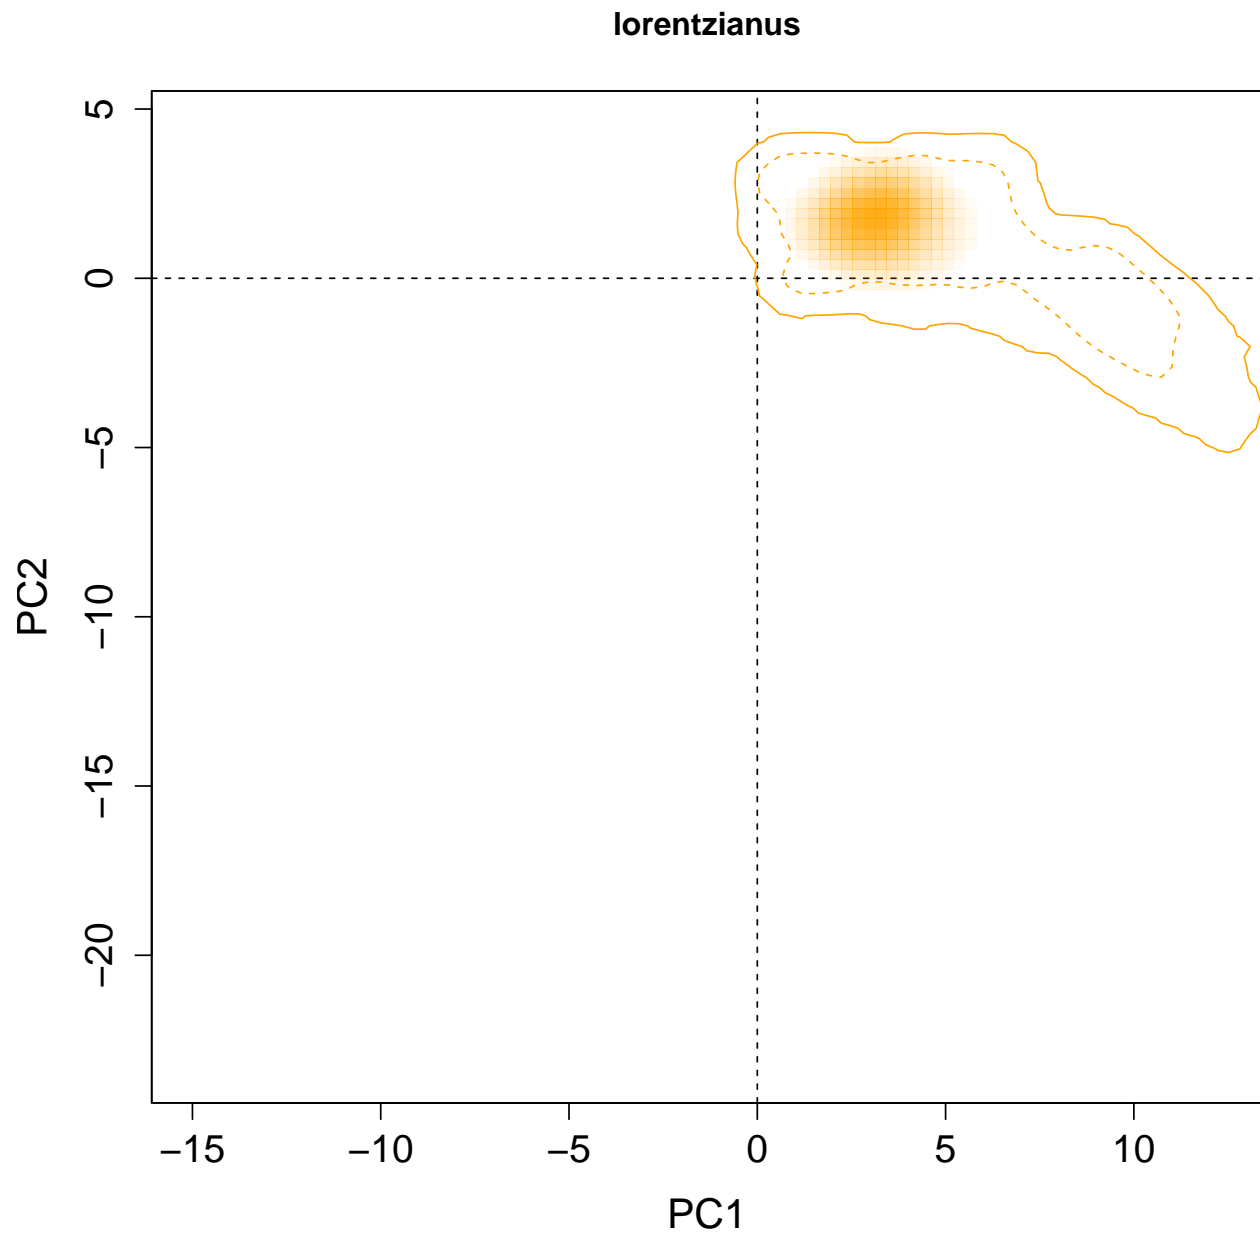

### Multiple niche plots

We also modified the same function to allow multiple regions/species plots.

```
plot.niche.all <- function(z, n.groups, g.names,
                           contornar = TRUE,
                           densidade = TRUE,
                           quantis = 10,
                           back = TRUE, title = "",
                           g.colors, n = 5,
                           cor1) {

  # Color func
  cor1 <- function(cores.i, n) {
```

```

al <- seq(0,1,(1/n))
cores <- numeric(length(n))
for(i in 1:n) {
  corespar <- col2rgb(cores.i)/255
  cores[i] <- rgb(corespar[1, ], corespar[2, ],
                 corespar[3, ], alpha = al[i])
}
return(cores)
}

a <- list()
for(i in 1:n.groups) {
  a[[i]] <- colorRampPalette(c("transparent", cor1(g.colors[i], n)),
                           alpha = TRUE)
}

xlim <- c(min(sapply(z, function(x){min(x$x)})),
          max(sapply(z, function(x){max(x$x)})))

ylim <- c(min(sapply(z, function(x){min(x$y)})),
          max(sapply(z, function(x){max(x$y)})))

image(z[[1]]$x, z[[1]]$y, t(as.matrix(z[[1]]$z.uncor))[, nrow(as.matrix(z[[1]]$z.uncor)):1], col = "white",
      ylim = ylim, xlim = xlim,
      zlim = c(0.000001, max(as.matrix(z[[1]]$Z), na.rm = T)),
      xlab = "PC1", ylab = "PC2", cex.lab = 1.5,
      cex.axis = 1.4)
abline(h = 0, v = 0, lty = 3)
box()

if (back) {
  for(i in 1:n.groups) {
    contour(z[[i]]$x, z[[i]]$y, t(as.matrix(z[[i]]$Z))[, nrow(as.matrix(z[[i]]$Z)):1], add = TRUE,
           levels = quantile(z[[i]]$Z[z[[i]]$Z > 0], c(0, 1)),
           drawlabels = FALSE, lty = c(2),
           col = g.colors[i], lwd = 1)
  }
}

if (densidade) {
  for(i in 1:n.groups) {
    image(z[[i]]$x, z[[i]]$y, t(as.matrix(z[[i]]$z.uncor))[, nrow(as.matrix(z[[i]]$z.uncor)):1],
         col = a[[i]](100), add = TRUE)
  }
}

if(contornar){
  for(i in 1:n.groups) {
    contour(z[[i]]$x, z[[i]]$y, t(as.matrix(z[[i]]$z.uncor))[, nrow(as.matrix(z[[i]]$z.uncor)):1], add = TRUE,
           levels = quantile(z[[i]]$z.uncor[z[[i]]$z.uncor > 0],
                             seq(0, 1, (1/quantis)))[quantis],

```

```

        drawlabels = FALSE, lty = rev(c(rep(2,(quantis - 1)), 1)),
        col = rev(cor1(g.colors[i], quantis)),
        lwd = rev(c(rep(1, (quantis - 1)), 2)))
    }
}

```

The results can be seen here. The strong contours represent the 20% highest values of density, and the dashed thin lines represent 100% of the background available in each region.

```

plot.niche.all(z, n.groups, g.names,
               contornar = TRUE,
               densidade = TRUE,
               quantis = 4,
               back = FALSE, title = "",
               g.colors, n = 3,
               cor1)

plot.niche.all(z, n.groups, g.names,
               contornar = TRUE,
               densidade = TRUE,
               quantis = 4,
               back = TRUE, title = "",
               g.colors, n = 3,
               cor1)

```

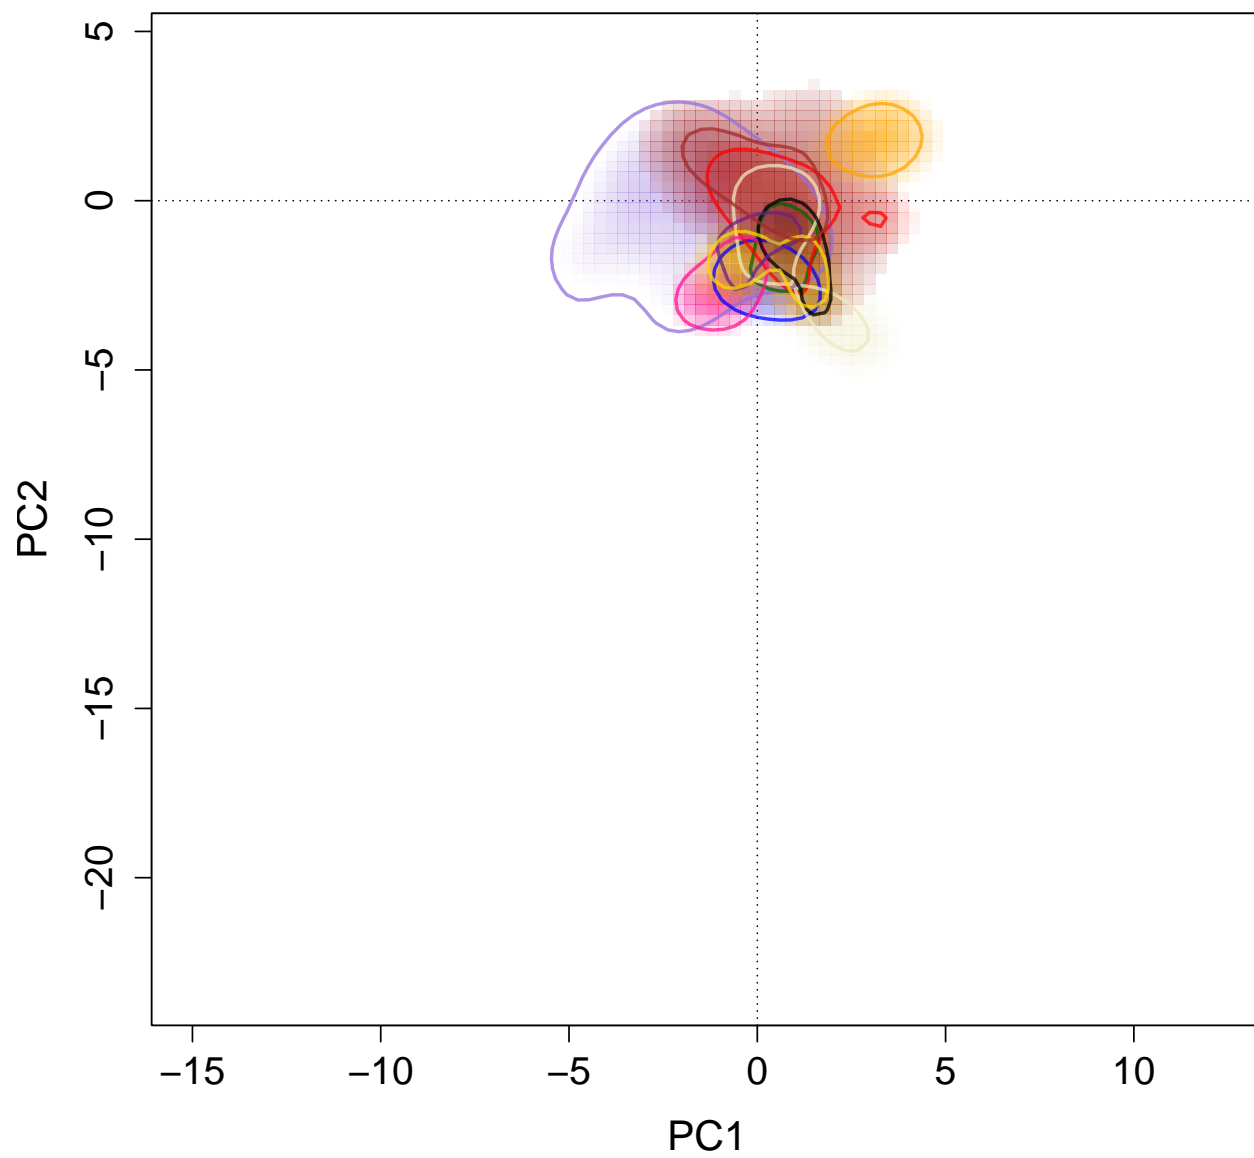

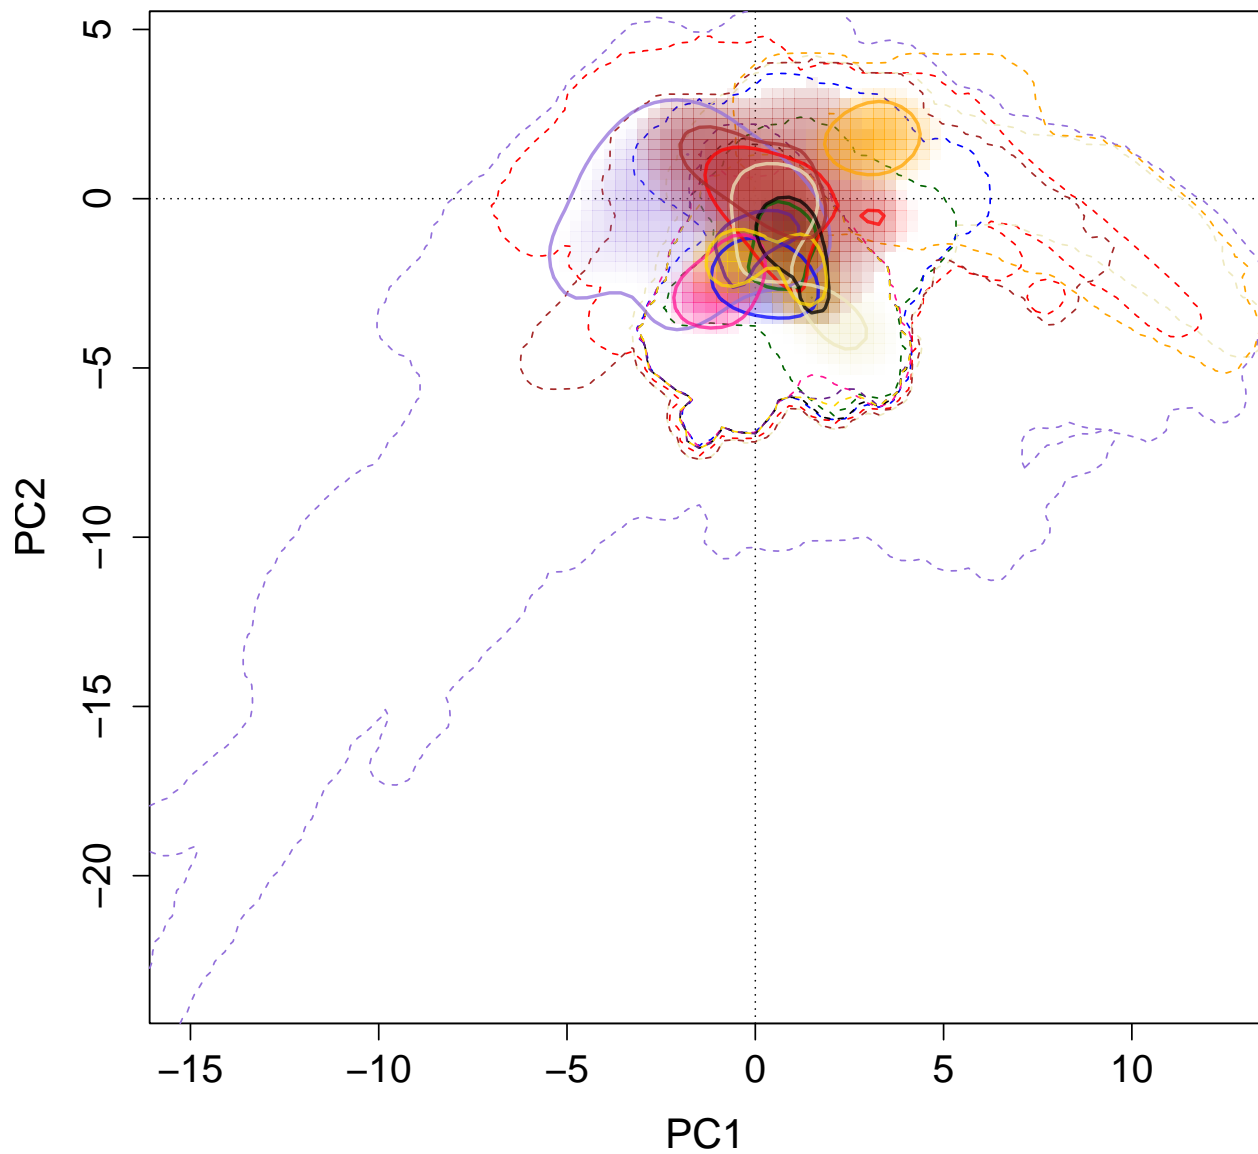

Regular plot:

```
col1 <- colorRampPalette(c(desaturate(g.colors[1]), g.colors[1]))(5)
col2 <- colorRampPalette(c(desaturate(g.colors[2]), g.colors[2]))(5)
col3 <- colorRampPalette(c(desaturate(g.colors[3]), g.colors[3]))(5)
col_int <- colorRampPalette(c(desaturate('#e7298a'), '#e7298a'))(5)

for (i in 2:n.groups) {
  ecospat.plot.niche.dyn(z[[1]], z[[i]], .5,
    colZ1 = g.colors[1],
    colZ2 = g.colors[i],
    colinter = adjustcolor(col_int, .4),
    colz1 = adjustcolor(col1, .4),
    colz2 = adjustcolor(col2, .4),
    name.axis1 = "PC1",
    name.axis2 = "PC2")
  mtext(paste(species[1], "x", species[i]), font = 3)
}
```

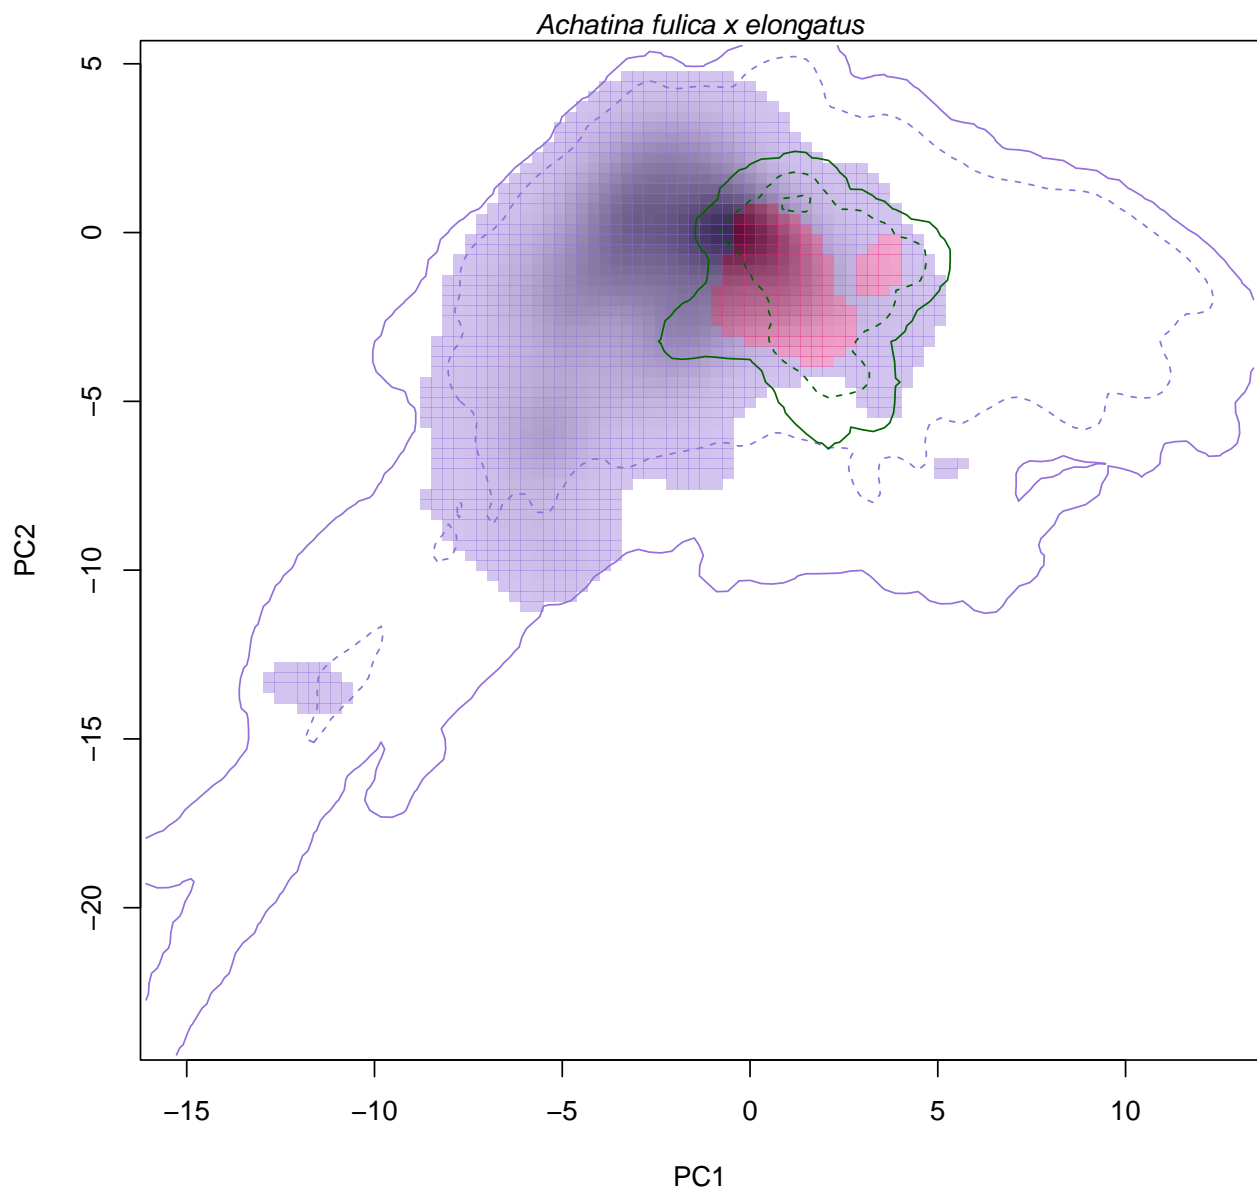



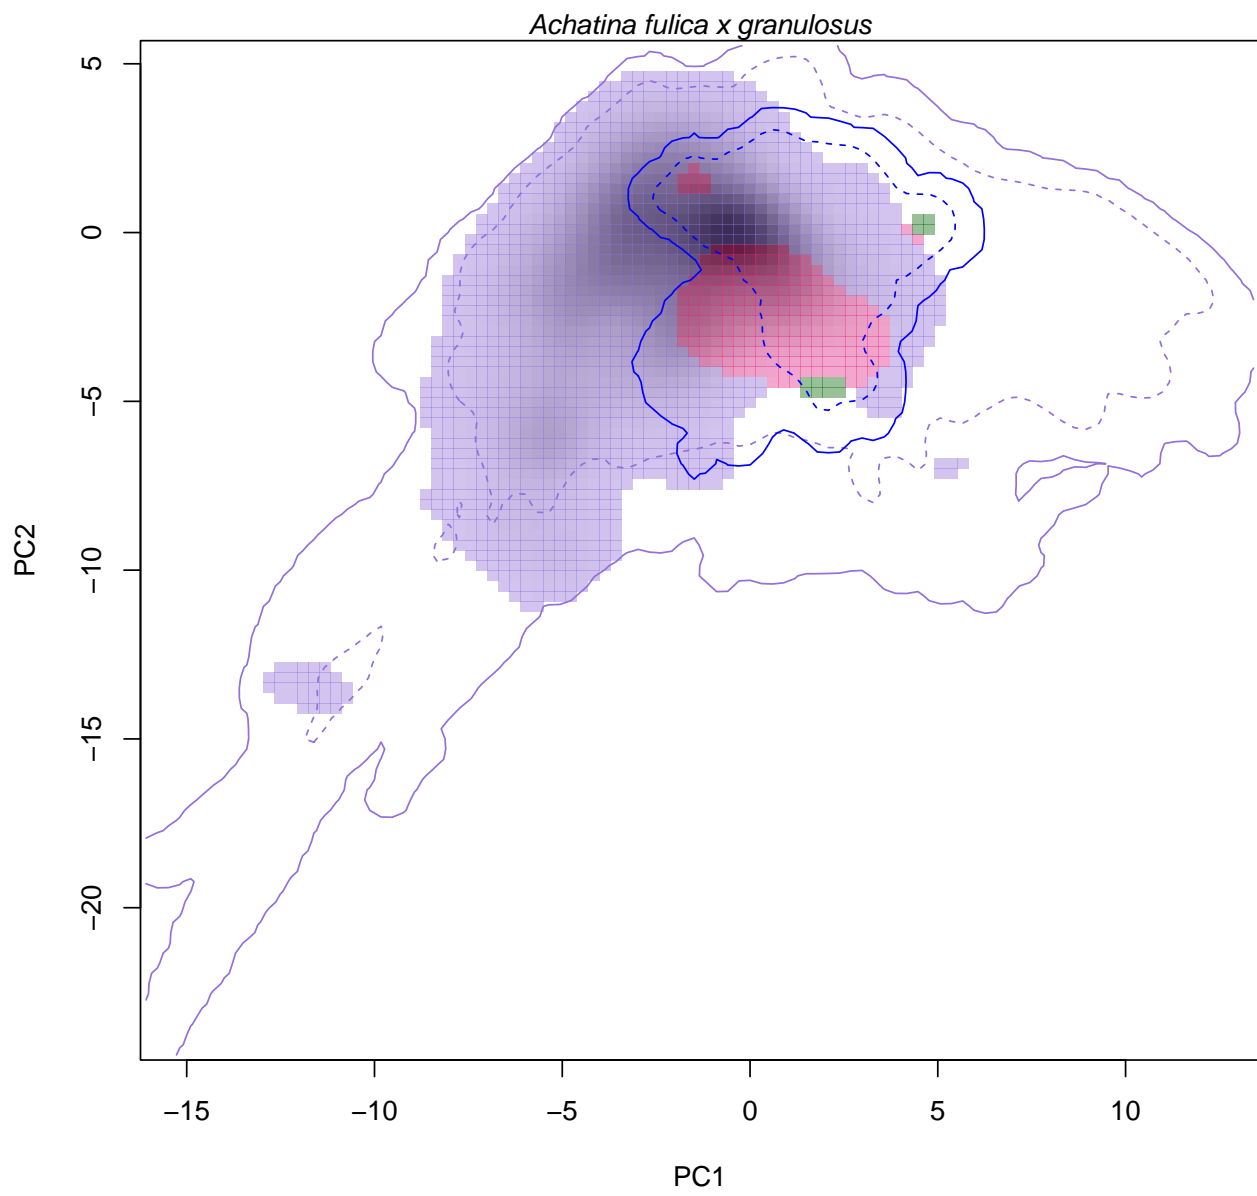

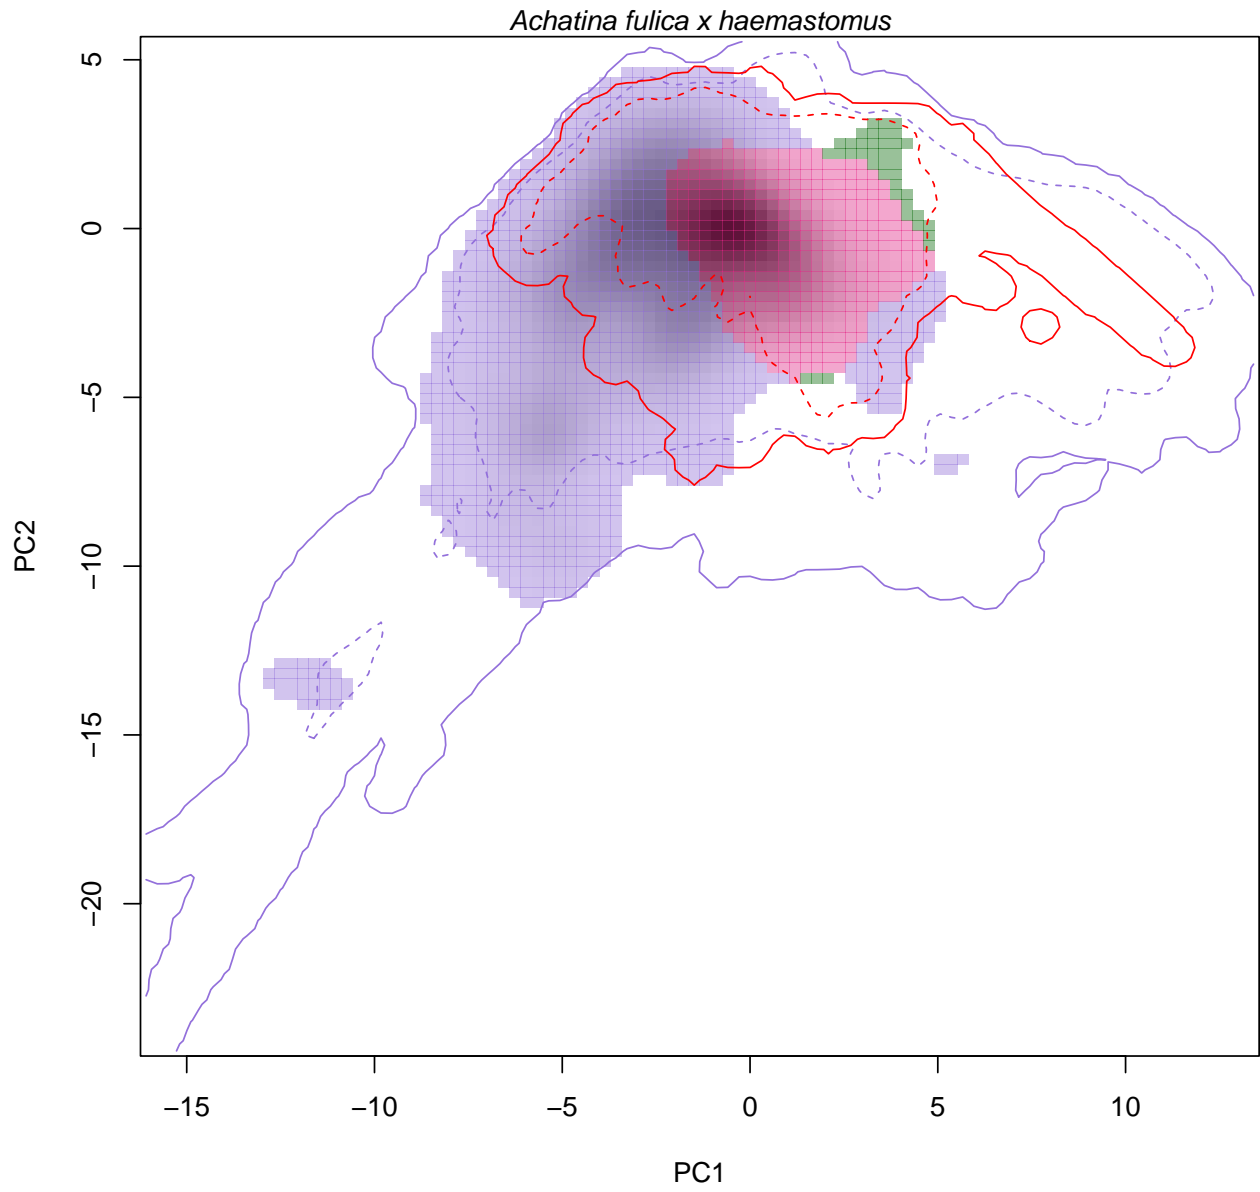

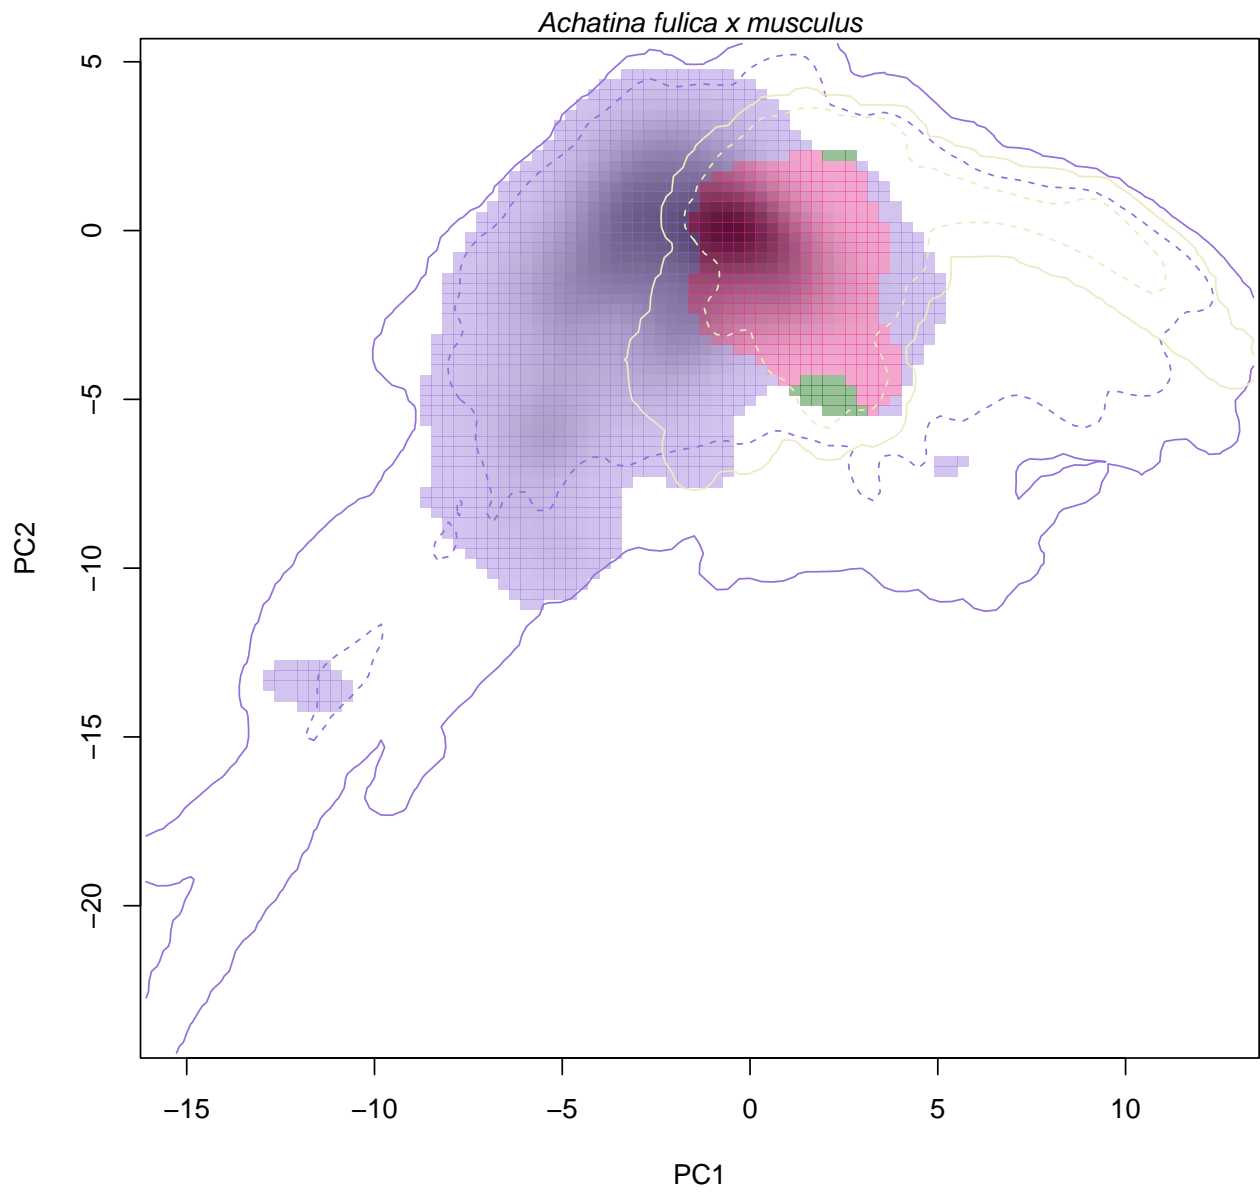

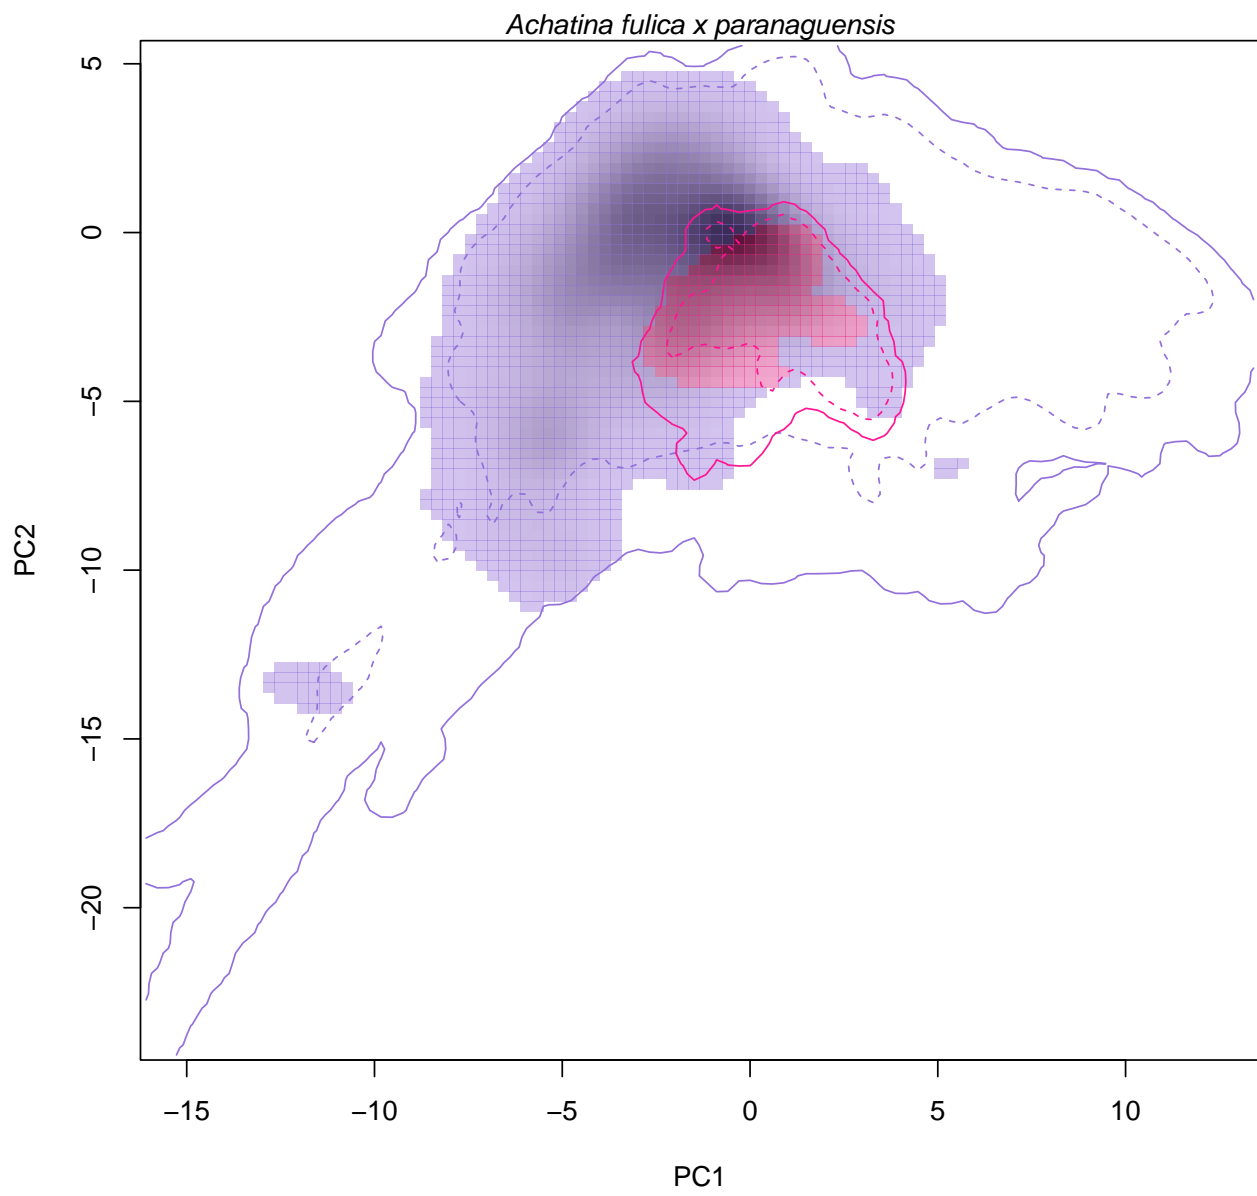

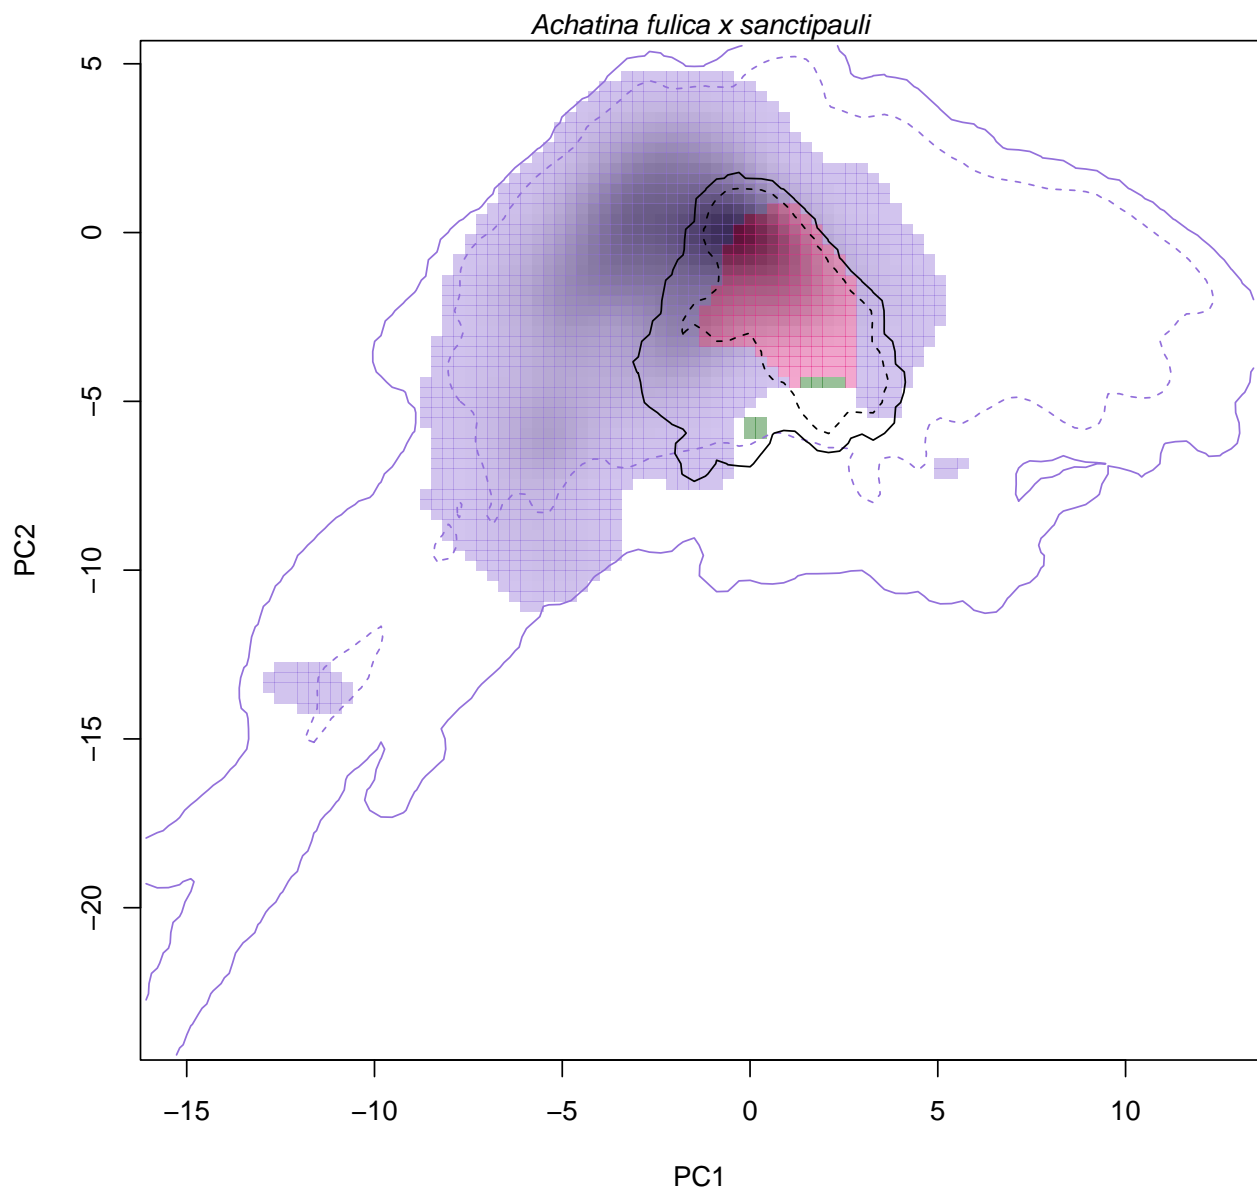

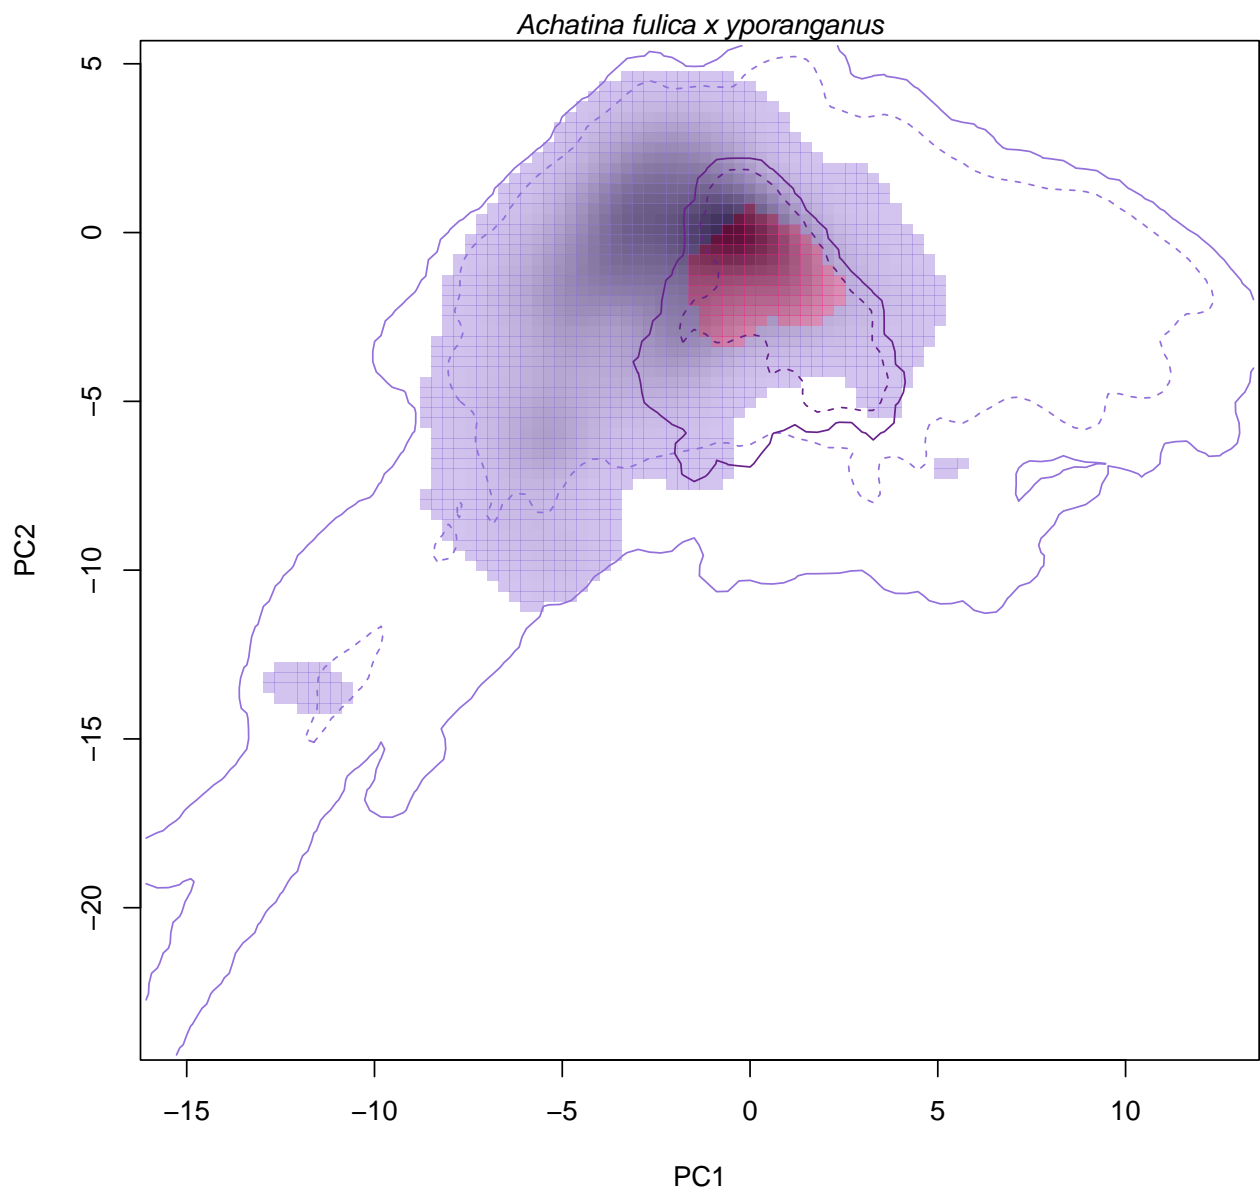

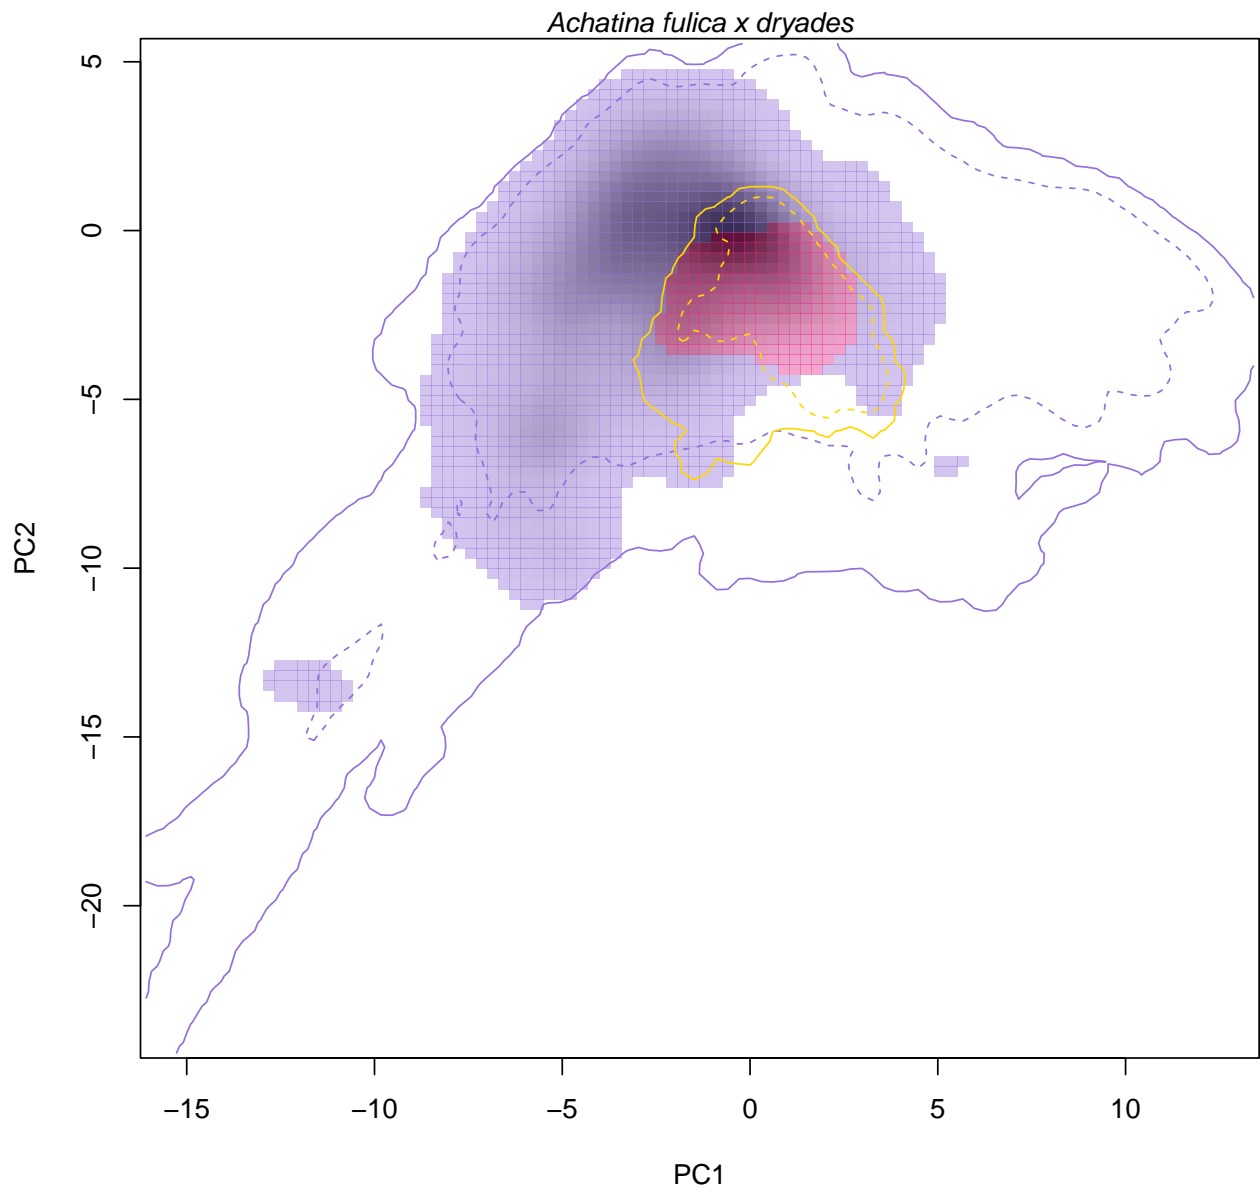

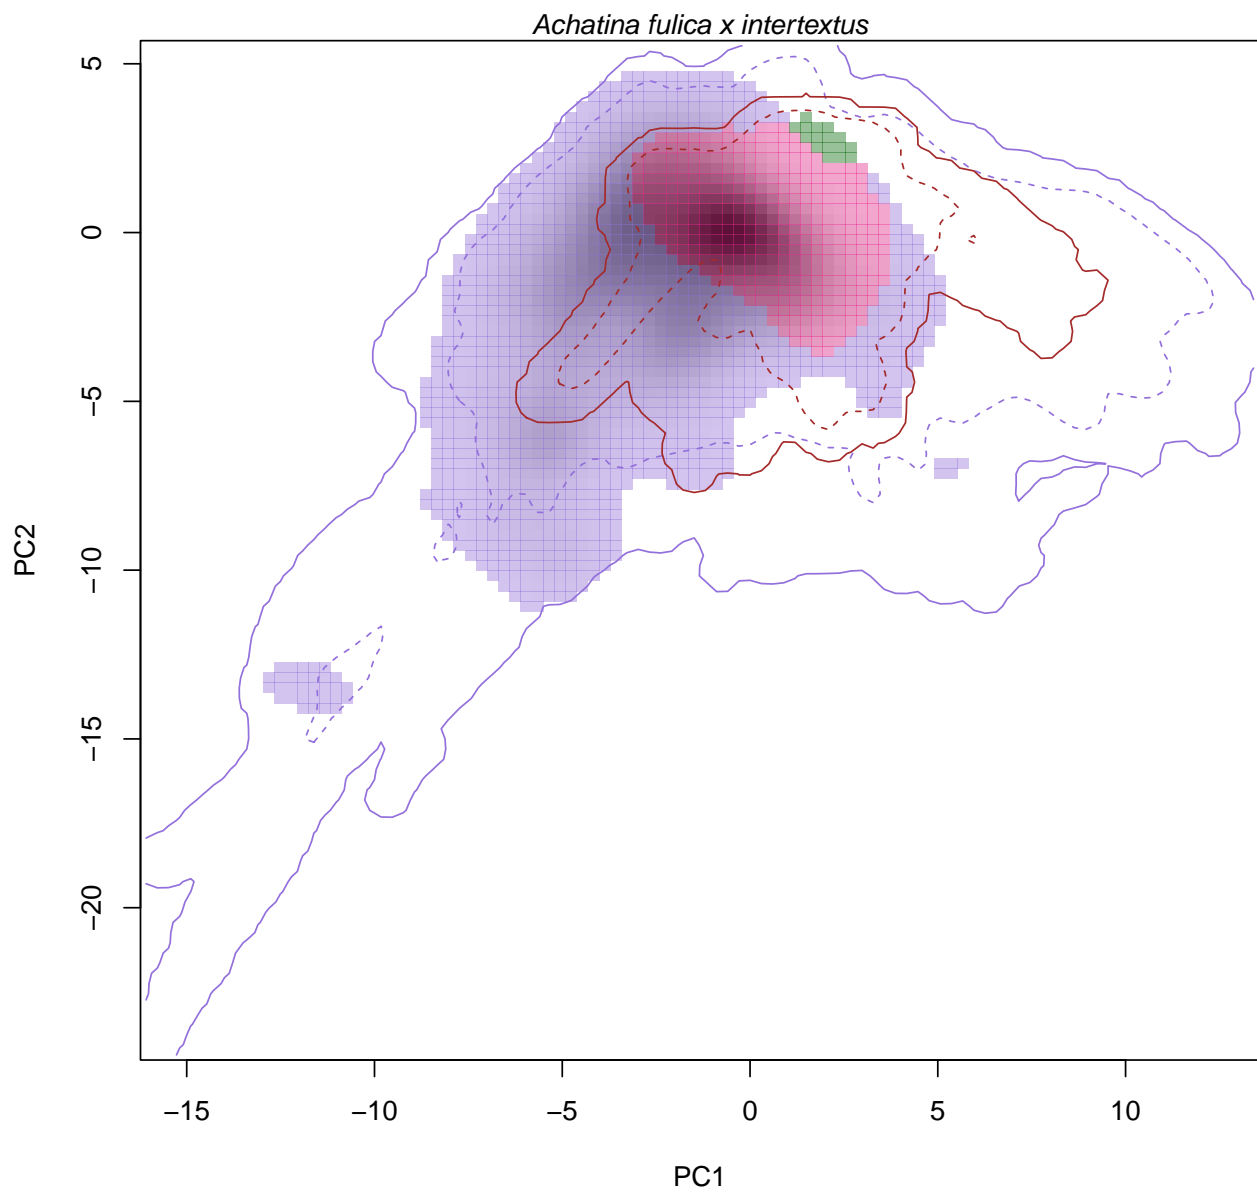



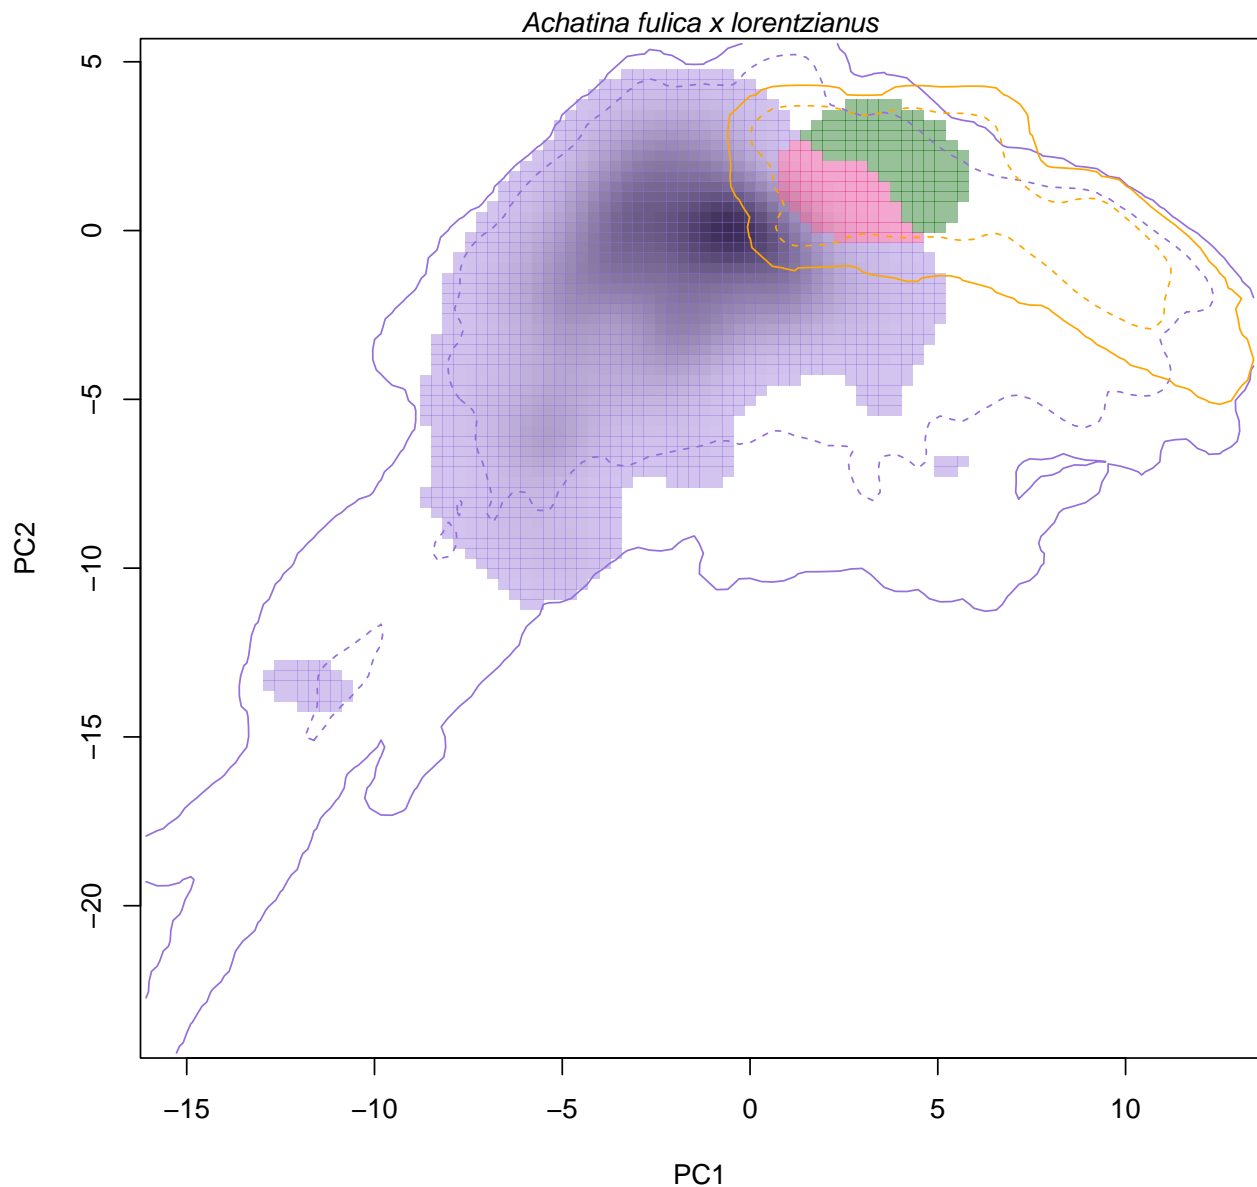

Below the loadings plot (contribution of the variables for each axis). Check the variable codes at <http://www.worldclim.org/bioclim>.

```
loadings <- cbind(cor(data.env, pca.cal$tab[,1]), cor(data.env, pca.cal$tab[,2]))
colnames(loadings) <- c("axis1", "axis2")
loadings <- loadings[c(1, 12:19, 2:11), ]

barplot(loadings[,1], las=2, main="PC1")

barplot(loadings[,2], las=2, main="PC2")
```

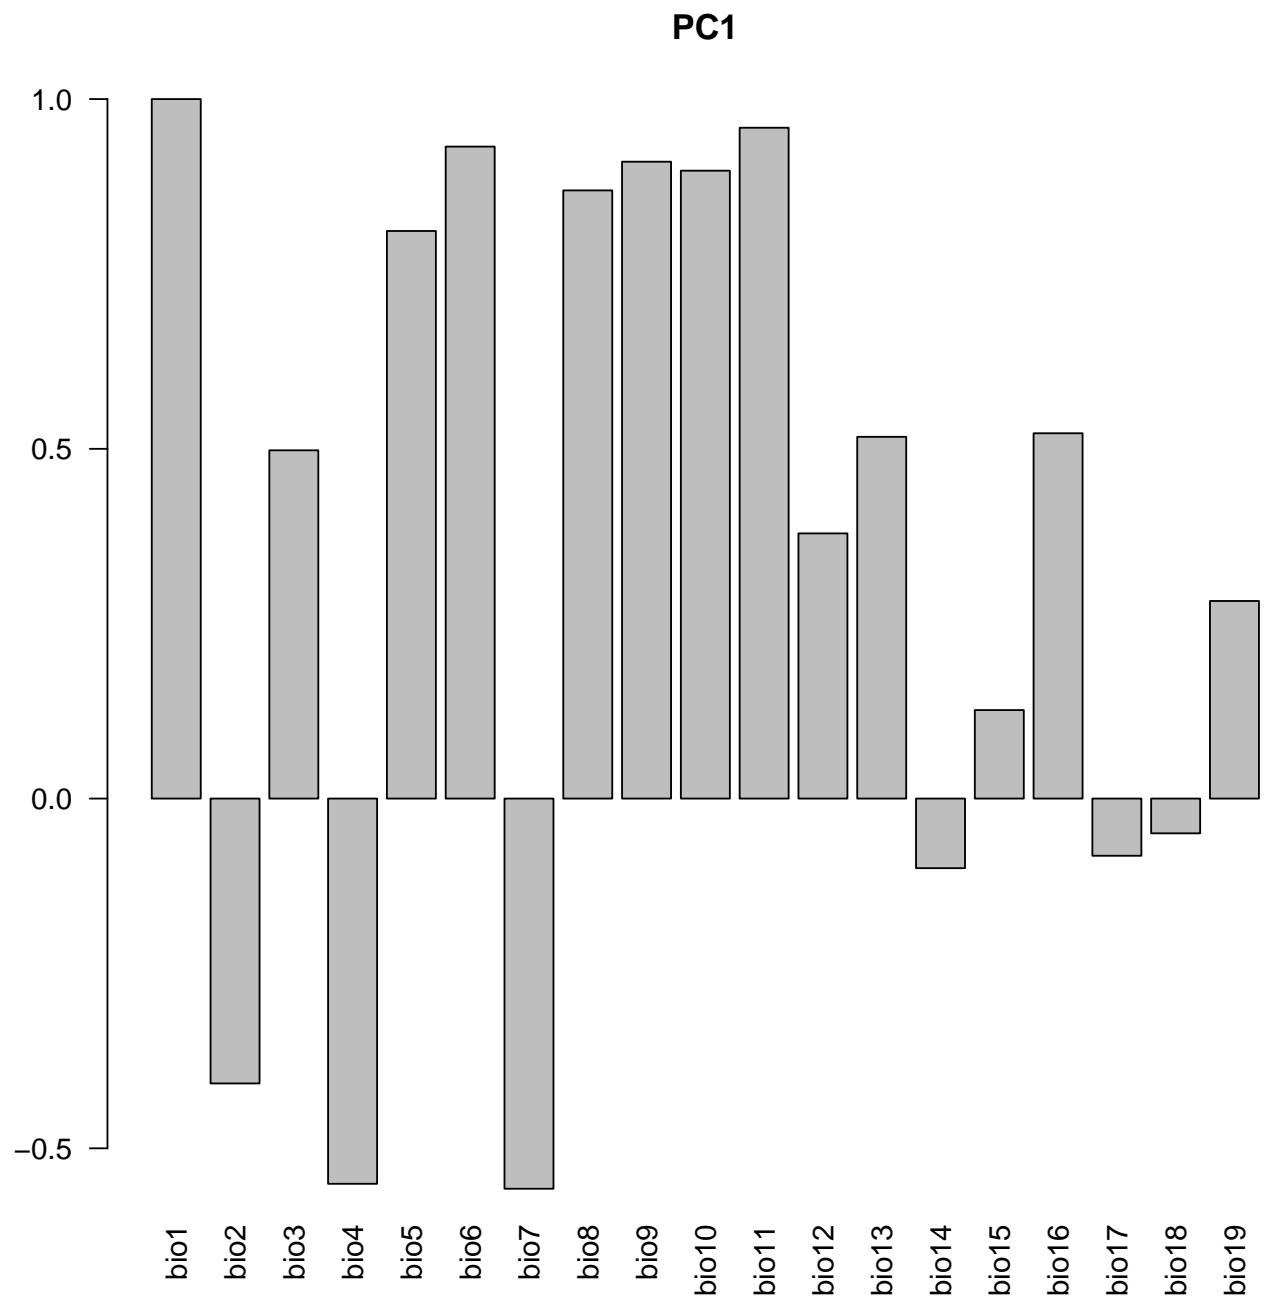

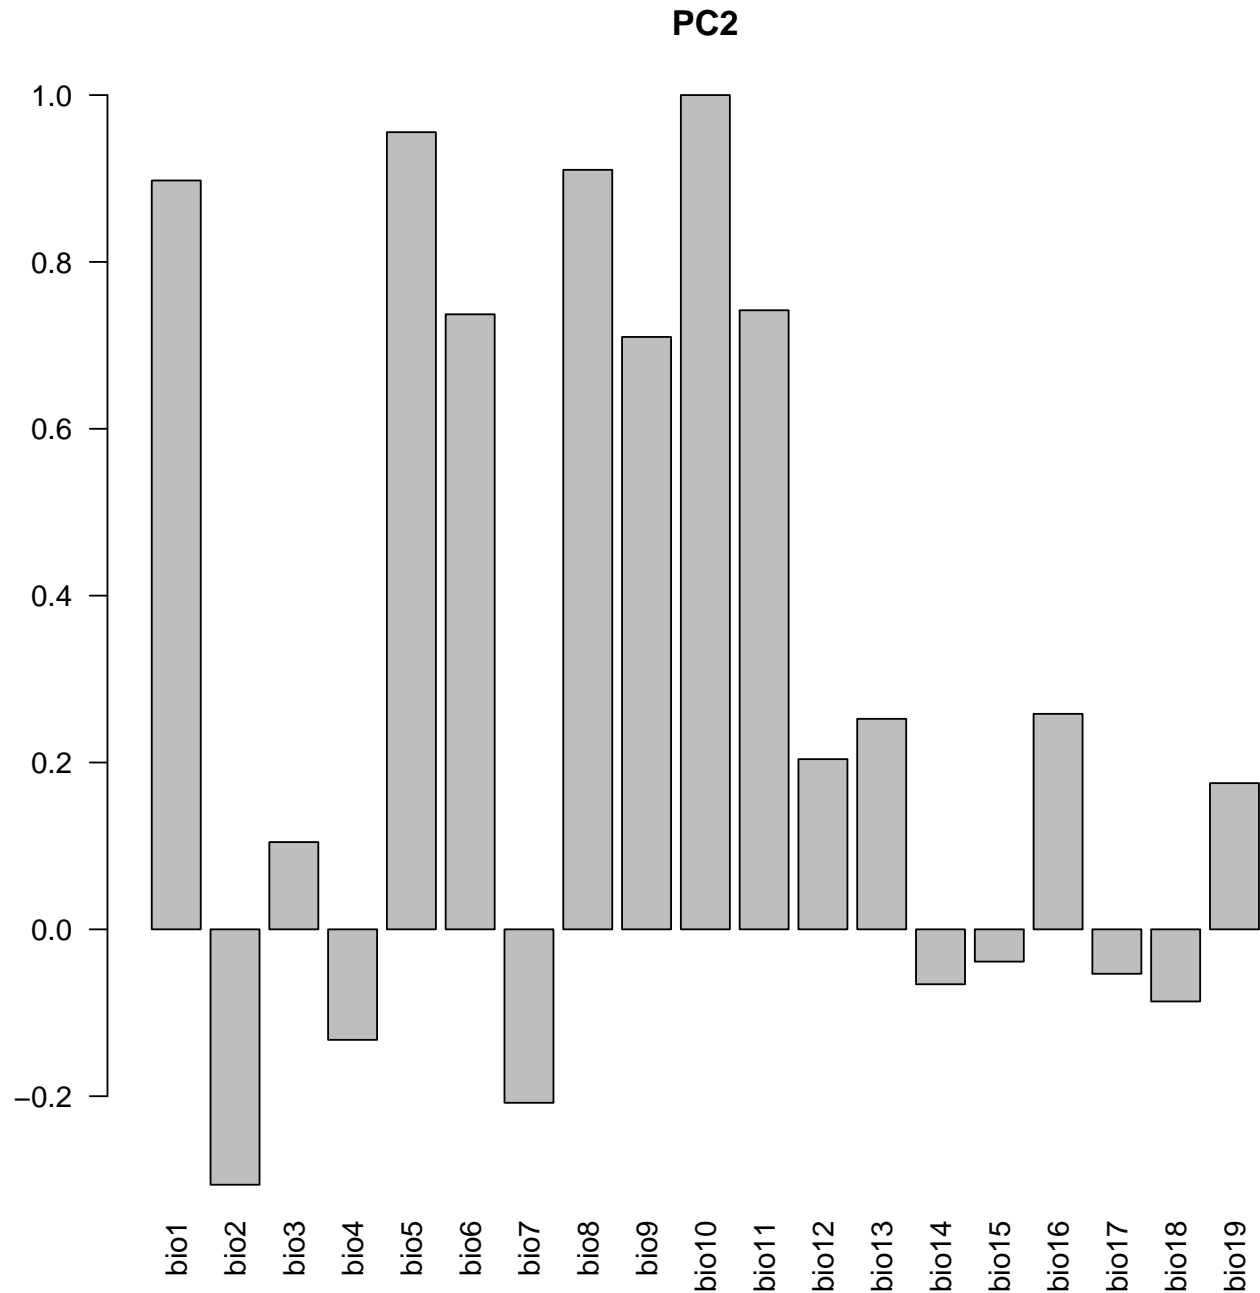

The arrows representing the contribution of each variable, directly on the environmental space.

```

contrib <- pca.cal$co
eigen <- pca.cal$eig
nombres <- numeric(19)
for(i in 1:19){
  nombres[i] <- paste('bio',i, sep="")
}
s.corcircle(contrib[, 1:2] / max(abs(contrib[, 1:2])),
            grid = F, label = nombres, clabel = 1.2)
text(0, -1.1, paste("PC1 (", round(eigen[1]/sum(eigen)*100,2), "%)",
                    sep = ""))
text(1.1, 0, paste("PC2 (", round(eigen[2]/sum(eigen)*100,2), "%)",

```

```
sep = ""), srt = 90)
```

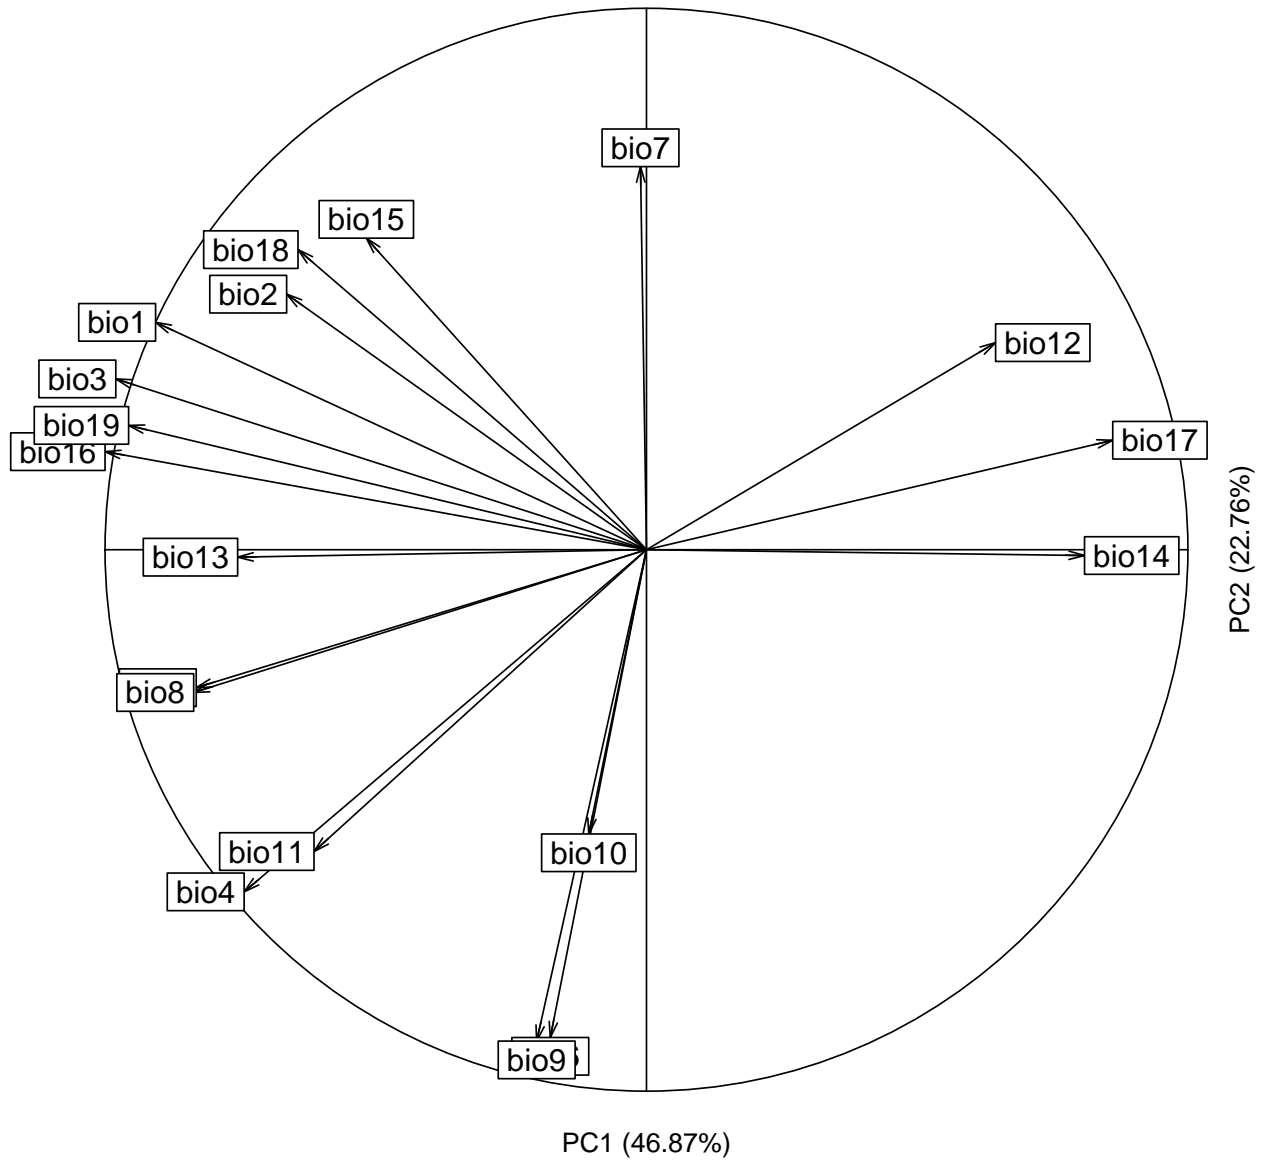

## References

- Aiello-Lammens, M. E., Boria, R. A., Radosavljevic, A., Vilela, B., & Anderson, R. P. (2015). spThin: an R package for spatial thinning of species occurrence records for use in ecological niche models. *Ecography*, 38(5), 541-545.
- Broennimann, O., Fitzpatrick, M. C., Pearman, P. B., Petitpierre, B., Pellissier, L., Yoccoz, N. G., & Guisan, A. (2012). Measuring ecological niche overlap from occurrence and spatial environmental data. *Global Ecology and Biogeography*, 21(4), 481-497.
